# Supplementary material for: Predictors of vision screening among Saudis at primary healthcare settings in Riyadh, Saudi Arabia: findings from a cross-sectional survey
Source: PeerJ journal article supplement (doi:10.7717/peerj.20239), 2025-10-23
Supplement: vision_data_to_PeerJ.xlsx [file vision_data_to_PeerJ.xlsx]

## Sheet: vision data
Age (years)	Gender	Education	Marital Status	Employment Status	Your current Health Status	Has_Disease_Diabetes	Has_Disease_High BP	Preventive procedures you had in the last year check all
71	Female	primary School	Married	Home Maker	Fair	Yes	Yes	None
89	Female	High School	Married	Home Maker	Very Good	Yes	Yes	None
101	Female	primary School	Married	Home Maker	Very Good	No	Yes	None
72	Male	High School	Married	Home Maker	Excellent	No	Yes	None
61	Male	High School	Married	Employed full time	Very Good	No	Yes	None
29	Male	High School	Single	Un employed due to an illness or disability	Excellent	Yes	Yes	None
104	Female	High School	Married	Home Maker	Very Good	Yes	Yes	Vision screening
115	Female	Other	Married	Home Maker	Good	Yes	Yes	Vision screening
104	Female	Other	Married	Retired	Good	Yes	Yes	Vision screening
91	Male	College Graduate	Married	Retired	Very Good	Yes	Yes	None
59	Female	College Graduate	Married	Employed full time	Very Good	No	Yes	None
78	Male	Dectorate	Married	Employed full time	Excellent	No	Yes	None
71	Female	High School	Married	Employed full time	Fair	Yes	Yes	None
38	Female	High School	Single	Student	Good	Yes	Yes	None
42	Female	College Graduate	Single	Un employed more than a year	Fair	No	Yes	None
74	Female	High School	Married	Employed full time	Excellent	Yes	Yes	Vision screening
97	Male	Other	Married	Retired	Fair	Yes	Yes	None
90	Female	College Graduate	Married	Retired	Good	Yes	Yes	Vision screening
108	Female	Other	Married	Home Maker	Good	Yes	Yes	Vision screening
108	Female	primary School	Married	Home Maker	Poor	Yes	Yes	Vision screening
113	Female	Other	Single	Home Maker	Good	Yes	Yes	Vision screening
60	Male	Master Graduate	Married	Employed full time	Excellent	No	Yes	Vision screening
77	Female	College Graduate	Married	Retired	Excellent	No	Yes	Vision screening
102	Male	Other	Married	Retired	Fair	Yes	Yes	None
72	Female	College Graduate	Married	Employed full time	Good	Yes	Yes	None
100	Female	Other	Single	Home Maker	Good	Yes	Yes	None
91	Female	High School	Married	Retired	Good	Yes	Yes	None
103	Male	College Graduate	Married	Retired	Fair	Yes	Yes	Vision screening
100	Female	Other	Married	Home Maker	Fair	Yes	Yes	None
74	Male	College Graduate	Married	Retired	Excellent	Yes	Yes	None
95	Male	Master Graduate	Married	Retired	Excellent	Yes	Yes	None
72	Female	Master Graduate	Married	Retired	Excellent	Yes	Yes	Vision screening
74	Female	High School	Married	Home Maker	Fair	No	Yes	None
78	Male	High School	Married	Employed full time	Fair	No	Yes	None
133	Female	Dectorate	Married	Retired	Excellent	Yes	Yes	Vision screening
78	Male	College Graduate	Married	Retired	Excellent	Yes	Yes	None
82	Female	Other	Single	Student	Good	Yes	Yes	None
87	Male	Other	Married	Retired	Good	Yes	Yes	None
113	Female	primary School	Single	Home Maker	Good	Yes	Yes	None
87	Female	Other	Married	Home Maker	Good	Yes	Yes	None
87	Female	Other	Married	Home Maker	Good	Yes	Yes	None
82	Male	High School	Married	Retired	Fair	No	Yes	None
86	Female	primary School	Married	Home Maker	Good	Yes	Yes	None
74	Female	High School	Single	Un employed more than a year	Good	No	Yes	None
24	Female	primary School	Single	Student	Good	Yes	Yes	None
98	Male	primary School	Married	Retired	Very Good	Yes	Yes	Vision screening
120	Female	Other	Married	Home Maker	Fair	Yes	Yes	Vision screening
71	Male	High School	Married	Employed full time	Excellent	No	Yes	Vision screening
85	Male	Did not finish High School	Married	Un employed more than a year	Good	Yes	Yes	Vision screening
95	Female	Other	Married	Home Maker	Fair	Yes	Yes	Vision screening
95	Male	Did not finish High School	Married	Retired	Very Good	Yes	Yes	None
70	Male	High School	Married	Employed full time	Excellent	Yes	Yes	None
70	Male	College Graduate	Married	Employed full time	Excellent	Yes	Yes	None
45	Male	College Graduate	Single	Employed full time	Very Good	No	Yes	None
95	Male	primary School	Married	Retired	Excellent	No	Yes	None
49	Male	College Graduate	Married	Student	Good	Yes	Yes	None
54	Female	College Graduate	Married	Home Maker	Excellent	No	Yes	None
90	Female	College Graduate	Married	Retired	Very Good	No	Yes	Vision screening
95	Female	Other	Married	Home Maker	Good	No	Yes	None
64	Female	High School	Single	Employed full time	Very Good	Yes	Yes	None
56	Female	Diploma	Single	Student	Fair	No	Yes	None
83	Female	primary School	Married	Home Maker	Very Good	No	Yes	None
55	Male	College Graduate	Married	Employed full time	Good	No	Yes	None
69	Female	High School	Married	Home Maker	Good	Yes	Yes	Vision screening
46	Female	College Graduate	Single	Employed full time	Very Good	Yes	Yes	None
88	Female	High School	Married	Home Maker	Very Good	Yes	Yes	Vision screening
70	Female	College Graduate	Married	Employed full time	Good	No	Yes	Vision screening
88	Male	High School	Married	Employed full time	Excellent	Yes	Yes	None
54	Male	primary School	Single	Retired	Excellent	Yes	Yes	None
111	Male	primary School	Married	Un employed due to an illness or disability	Very Good	No	Yes	None
77	Female	College Graduate	Married	Employed full time	Very Good	No	Yes	None
71	Male	Diploma	Married	Employed part time	Fair	No	Yes	None
111	Female	primary School	Married	Home Maker	Good	Yes	Yes	Vision screening
62	Female	Diploma	Married	Home Maker	Very Good	No	Yes	None
99	Female	Other	Married	Home Maker	Fair	No	Yes	Vision screening
85	Male	Did not finish High School	Married	Retired	Excellent	No	Yes	Vision screening
87	Female	High School	Married	Home Maker	Good	Yes	Yes	Vision screening
113	Female	Did not finish High School	Married	Home Maker	Very Good	No	Yes	None
87	Female	primary School	Married	Home Maker	Good	Yes	Yes	Vision screening
75	Male	College Graduate	Married	Employed full time	Very Good	Yes	Yes	None
100	Male	Did not finish High School	Married	Retired	Fair	Yes	Yes	None
75	Female	Diploma	Married	Home Maker	Good	Yes	Yes	None
108	Female	primary School	Married	Home Maker	Good	Yes	Yes	Vision screening
64	Female	High School	Married	Employed part time	Very Good	No	Yes	None
90	Female	primary School	Married	Home Maker	Good	Yes	Yes	None
77	Female	Diploma	Married	Employed full time	Good	No	Yes	None
82	Male	primary School	Married	Retired	Fair	Yes	Yes	Vision screening
101	Male	High School	Married	Retired	Good	Yes	Yes	None
73	Female	High School	Married	Home Maker	Very Good	Yes	Yes	Vision screening
73	Female	primary School	Married	Home Maker	Very Good	Yes	Yes	Vision screening
95	Male	High School	Married	Retired	Good	Yes	Yes	None
85	Male	College Graduate	Married	Employed full time	Very Good	No	Yes	None
108	Male	Did not finish High School	Married	Retired	Very Good	Yes	Yes	Vision screening
82	Male	College Graduate	Married	Employed part time	Good	Yes	Yes	None
35	Female	Did not finish High School	Single	Student	Fair	Yes	Yes	None
34	Female	High School	Single	Student	Very Good	No	Yes	Vision screening
68	Female	High School	Single	Un employed more than a year	Excellent	No	Yes	None
108	Male	High School	Married	Retired	Very Good	Yes	Yes	None
108	Male	Other	Married	Retired	Good	Yes	Yes	Vision screening
47	Male	High School	Single	Un employed less than a year	Excellent	Yes	Yes	None
97	Male	primary School	Married	Retired	Very Good	Yes	Yes	None
68	Female	Other	Married	Home Maker	Excellent	No	Yes	None
77	Male	College Graduate	Married	Employed full time	Very Good	Yes	Yes	Vision screening
45	Male	High School	Single	Employed full time	Excellent	Yes	Yes	None
95	Female	primary School	Married	Home Maker	Good	No	Yes	Vision screening
57	Female	High School	Married	Home Maker	Good	No	Yes	None
104	Female	Other	Married	Home Maker	Fair	Yes	Yes	Vision screening
57	Female	High School	Single	Un employed more than a year	Good	No	Yes	None
100	Male	Other	Married	Home Maker	Fair	No	Yes	Vision screening
75	Female	Diploma	Married	Employed full time	Fair	No	Yes	None
70	Female	High School	Married	Home Maker	Good	No	Yes	None
83	Female	Other	Married	Home Maker	Very Good	Yes	Yes	Vision screening
60	Female	Did not finish High School	Married	Retired	Good	Yes	Yes	None
82	Male	Did not finish High School	Married	Retired	Good	Yes	Yes	None
108	Male	College Graduate	Married	Retired	Very Good	No	Yes	None
68	Female	College Graduate	Married	Employed full time	Good	Yes	Yes	None
87	Male	High School	Married	Employed full time	Excellent	No	Yes	None
91	Male	High School	Married	Retired	Good	Yes	Yes	Vision screening
90	Male	High School	Married	Home Maker	Very Good	Yes	Yes	Vision screening
100	Female	Did not finish High School	Married	Home Maker	Fair	Yes	Yes	None
95	Female	Other	Married	Student	Good	No	Yes	None
97	Female	primary School	Married	Home Maker	Good	Yes	Yes	None
73	Male	College Graduate	Married	Employed full time	Poor	Yes	Yes	None
73	Male	College Graduate	Married	Employed full time	Fair	Yes	Yes	None
98	Female	primary School	Married	Home Maker	Good	Yes	Yes	Vision screening
103	Male	High School	Married	Retired	Good	Yes	Yes	None
75	Male	High School	Married	Employed full time	Fair	Yes	Yes	None
75	Male	High School	Married	Employed full time	Good	Yes	Yes	None
96	Male	High School	Married	Retired	Very Good	Yes	Yes	None
109	Male	High School	Married	Retired	Good	Yes	Yes	Vision screening
59	Male	High School	Married	Un employed less than a year	Excellent	Yes	Yes	None
60	Male	College Graduate	Married	Employed full time	Excellent	Yes	Yes	None
50	Female	College Graduate	Single	Un employed due to an illness or disability	Excellent	No	Yes	None
68	Female	College Graduate	Married	Employed full time	Fair	Yes	Yes	Vision screening
75	Male	High School	Married	Employed full time	Very Good	No	Yes	None
77	Female	Other	Married	Employed part time	Good	Yes	Yes	None
43	Male	Diploma	Single	Un employed due to an illness or disability	Good	Yes	Yes	Vision screening
69	Male	College Graduate	Married	Employed full time	Fair	No	Yes	Vision screening
59	Female	Master Graduate	Married	Home Maker	Very Good	Yes	Yes	None
89	Male	College Graduate	Married	Retired	Fair	No	Yes	None
96	Male	Master Graduate	Married	Retired	Very Good	Yes	Yes	Vision screening
100	Male	High School	Married	Un employed less than a year	Poor	Yes	Yes	None
45	Female	Diploma	Single	Home Maker	Good	No	Yes	Vision screening
82	Female	primary School	Married	Home Maker	Poor	No	Yes	Vision screening
50	Female	College Graduate	Single	Un employed due to an illness or disability	Excellent	No	Yes	None
63	Male	High School	Married	Employed part time	Good	Yes	Yes	None
47	Female	College Graduate	Single	Employed full time	Good	No	Yes	None
95	Male	Other	Married	Employed full time	Fair	No	Yes	None
82	Female	Other	Married	Home Maker	Fair	No	Yes	None
36	Female	Diploma	Single	Student	Very Good	Yes	Yes	None
77	Female	College Graduate	Single	Employed full time	Good	Yes	Yes	None
50	Male	Diploma	Married	Home Maker	Good	Yes	Yes	None
64	Female	Master Graduate	Married	Un employed more than a year	Fair	Yes	Yes	None
78	Female	High School	Married	Home Maker	Good	No	Yes	None
77	Female	Diploma	Married	Employed full time	Good	No	Yes	None
57	Male	High School	Single	Employed full time	Fair	No	Yes	None
99	Male	College Graduate	Married	Employed full time	Very Good	Yes	Yes	Vision screening
71	Female	Other	Married	Employed full time	Good	Yes	Yes	Vision screening
85	Male	College Graduate	Married	Employed full time	Good	Yes	Yes	None
60	Female	College Graduate	Married	Home Maker	Excellent	Yes	Yes	None
43	Female	College Graduate	Single	Employed full time	Fair	Yes	Yes	Vision screening
96	Male	College Graduate	Married	Retired	Good	Yes	Yes	Vision screening
36	Female	High School	Single	Student	Excellent	Yes	Yes	None
95	Female	primary School	Married	Home Maker	Fair	Yes	Yes	Vision screening
87	Female	primary School	Married	Home Maker	Good	No	Yes	Vision screening
54	Female	High School	Married	Home Maker	Good	Yes	Yes	None
82	Female	Other	Married	Employed full time	Fair	Yes	Yes	None
95	Female	primary School	Married	Home Maker	Fair	Yes	Yes	None
117	Male	High School	Married	Retired	Fair	Yes	Yes	None
50	Female	College Graduate	Married	Un employed more than a year	Excellent	Yes	Yes	None
68	Male	Master Graduate	Married	Employed full time	Very Good	Yes	Yes	Vision screening
59	Male	High School	Married	Employed part time	Very Good	No	Yes	None
45	Female	College Graduate	Married	Home Maker	Very Good	No	Yes	None
56	Female	College Graduate	Married	Employed part time	Very Good	No	Yes	None
34	Male	High School	Single	Student	Excellent	No	Yes	None
62	Male	College Graduate	Married	Employed full time	Excellent	Yes	Yes	None
54	Male	College Graduate	Single	Employed full time	Fair	No	Yes	Vision screening
64	Male	College Graduate	Married	Employed full time	Excellent	No	Yes	None
36	Male	High School	Single	Student	Excellent	Yes	Yes	None
83	Female	Other	Married	Home Maker	Excellent	No	Yes	Vision screening
42	Female	Other	Single	Student	Excellent	No	Yes	None
68	Male	Other	Married	Employed full time	Very Good	No	Yes	None
46	Male	College Graduate	Single	Employed full time	Excellent	No	Yes	None
86	Male	College Graduate	Married	Employed full time	Very Good	No	Yes	None
50	Female	Did not finish High School	Married	Home Maker	Excellent	Yes	Yes	None
82	Female	Did not finish High School	Married	Home Maker	Very Good	No	Yes	None
82	Female	primary School	Married	Home Maker	Excellent	Yes	Yes	Vision screening
77	Male	Other	Single	Employed full time	Good	Yes	Yes	Vision screening
82	Female	primary School	Married	Home Maker	Fair	Yes	Yes	None
57	Female	College Graduate	Married	Employed full time	Very Good	Yes	Yes	None
61	Female	Diploma	Married	Employed full time	Excellent	Yes	Yes	None
95	Female	Other	Married	Home Maker	Poor	No	Yes	Vision screening
57	Female	Diploma	Married	Employed full time	Good	No	Yes	None
101	Female	Did not finish High School	Married	Home Maker	Excellent	Yes	Yes	Vision screening
54	Female	College Graduate	Married	Home Maker	Good	Yes	Yes	None
72	Female	primary School	Married	Home Maker	Very Good	Yes	Yes	None
78	Male	College Graduate	Married	Employed full time	Excellent	Yes	Yes	None
49	Female	College Graduate	Married	Employed part time	Very Good	Yes	Yes	None
49	Female	College Graduate	Single	Employed full time	Very Good	No	Yes	Vision screening
57	Female	College Graduate	Married	Employed part time	Very Good	Yes	Yes	None
87	Female	Other	Married	Home Maker	Very Good	Yes	Yes	None
95	Female	primary School	Married	Home Maker	Good	Yes	Yes	None
43	Female	High School	Single	Un employed less than a year	Excellent	Yes	Yes	None
57	Female	High School	Married	Home Maker	Very Good	No	Yes	None
38	Female	College Graduate	Single	Student	Fair	No	Yes	None
38	Female	College Graduate	Single	Employed part time	Poor	Yes	Yes	None
42	Female	High School	Single	Student	Excellent	No	Yes	None
82	Female	Other	Married	Home Maker	Good	Yes	Yes	None
118	Male	primary School	Single	Student	Excellent	Yes	Yes	None
35	Female	High School	Single	Student	Good	Yes	Yes	None
72	Female	primary School	Married	Home Maker	Very Good	Yes	Yes	None
63	Female	College Graduate	Married	Employed full time	Excellent	Yes	Yes	Vision screening
96	Male	primary School	Married	Retired	Good	Yes	Yes	Vision screening
75	Female	Other	Married	Employed part time	Very Good	Yes	Yes	None
82	Female	primary School	Married	Home Maker	Fair	Yes	Yes	None
46	Male	College Graduate	Single	Employed full time	Very Good	No	Yes	None
74	Female	Diploma	Single	Employed full time	Excellent	No	Yes	None
82	Male	Other	Married	Retired	Very Good	No	Yes	None
84	Male	College Graduate	Single	Employed full time	Good	Yes	Yes	None
68	Female	High School	Single	Home Maker	Poor	Yes	Yes	None
85	Male	College Graduate	Married	Employed full time	Very Good	Yes	Yes	None
82	Female	College Graduate	Single	Home Maker	Poor	Yes	Yes	Vision screening
75	Male	High School	Married	Employed full time	Good	Yes	Yes	None
60	Female	High School	Married	Un employed less than a year	Good	Yes	Yes	None
84	Male	College Graduate	Married	Employed full time	Very Good	Yes	Yes	Vision screening
40	Female	High School	Single	Student	Excellent	No	Yes	None
40	Female	Other	Single	Student	Excellent	Yes	Yes	None
40	Female	Other	Single	Student	Excellent	Yes	Yes	None
102	Female	Other	Married	Home Maker	Excellent	Yes	Yes	Vision screening
40	Female	High School	Single	Student	Very Good	No	Yes	Vision screening
89	Male	College Graduate	Married	Employed part time	Very Good	Yes	Yes	None
97	Male	Other	Married	Retired	Very Good	Yes	Yes	Vision screening
50	Female	College Graduate	Married	Employed full time	Excellent	No	Yes	None
46	Female	College Graduate	Single	Employed part time	Very Good	Yes	Yes	None
47	Female	College Graduate	Single	Un employed more than a year	Excellent	Yes	Yes	None
46	Female	College Graduate	Single	Student	Excellent	Yes	Yes	None
88	Female	Other	Married	Home Maker	Very Good	Yes	Yes	None
49	Female	College Graduate	Married	Employed part time	Excellent	Yes	Yes	None
43	Female	College Graduate	Single	Student	Excellent	No	Yes	None
95	Male	High School	Married	Employed part time	Good	Yes	Yes	None
56	Male	Master Graduate	Single	Employed full time	Excellent	No	Yes	Vision screening
46	Female	High School	Single	Un employed more than a year	Very Good	No	Yes	Vision screening
47	Male	College Graduate	Single	Un employed more than a year	Fair	No	Yes	None
47	Female	College Graduate	Married	Home Maker	Good	No	Yes	None
45	Female	Diploma	Married	Home Maker	Very Good	No	Yes	None
72	Male	High School	Married	Home Maker	Good	No	Yes	None
61	Male	College Graduate	Married	Employed full time	Very Good	No	Yes	None
66	Male	Other	Single	Un employed less than a year	Good	Yes	Yes	None
73	Female	primary School	Married	Home Maker	Fair	Yes	Yes	None
47	Female	College Graduate	Single	Employed full time	Very Good	Yes	Yes	None
34	Female	Did not finish High School	Single	Student	Good	No	Yes	Vision screening
55	Male	College Graduate	Married	Employed full time	Very Good	Yes	Yes	None
82	Male	Did not finish High School	Married	Retired	Good	Yes	Yes	None
84	Female	Diploma	Married	Employed full time	Good	Yes	Yes	Vision screening
69	Male	College Graduate	Married	Employed full time	Excellent	No	Yes	None
100	Female	Other	Married	Home Maker	Good	Yes	Yes	None
68	Female	College Graduate	Single	Un employed more than a year	Excellent	No	Yes	None
95	Female	Other	Married	Home Maker	Good	Yes	Yes	None
47	Male	College Graduate	Single	Employed full time	Excellent	Yes	Yes	None
97	Male	College Graduate	Married	Retired	Very Good	Yes	Yes	None
100	Male	College Graduate	Married	Retired	Good	Yes	Yes	None
109	Male	Did not finish High School	Married	Retired	Good	Yes	Yes	Vision screening
78	Female	College Graduate	Single	Employed full time	Good	Yes	Yes	None
46	Female	High School	Married	Home Maker	Very Good	Yes	Yes	None
82	Female	Did not finish High School	Married	Home Maker	Very Good	No	Yes	None
34	Male	primary School	Single	Student	Excellent	Yes	Yes	None
74	Male	Other	Married	Employed full time	Good	No	Yes	None
70	Female	Diploma	Married	Employed full time	Very Good	No	Yes	None
73	Female	High School	Married	Home Maker	Very Good	Yes	Yes	Vision screening
35	Female	Did not finish High School	Single	Home Maker	Fair	Yes	Yes	None
45	Female	Diploma	Married	Home Maker	Very Good	No	Yes	None
45	Female	College Graduate	Single	Home Maker	Very Good	Yes	Yes	None
45	Female	College Graduate	Single	Home Maker	Very Good	Yes	Yes	None
45	Female	College Graduate	Single	Home Maker	Very Good	Yes	Yes	None
45	Female	College Graduate	Single	Home Maker	Very Good	Yes	Yes	None
87	Female	Other	Married	Home Maker	Very Good	Yes	Yes	None
45	Female	College Graduate	Single	Home Maker	Very Good	Yes	Yes	None
45	Female	College Graduate	Single	Home Maker	Very Good	Yes	Yes	None
108	Female	primary School	Married	Home Maker	Good	No	Yes	None
42	Female	Diploma	Single	Un employed due to an illness or disability	Very Good	Yes	Yes	Vision screening
46	Female	Diploma	Married	Employed part time	Excellent	Yes	Yes	None
73	Female	High School	Married	Employed full time	Good	Yes	Yes	None
50	Female	High School	Single	Un employed more than a year	Very Good	No	Yes	None
68	Male	Other	Married	Employed part time	Very Good	No	Yes	None
78	Male	College Graduate	Married	Employed full time	Good	No	Yes	None
77	Female	Did not finish High School	Married	Home Maker	Very Good	No	Yes	None
78	Female	Other	Married	Un employed due to an illness or disability	Very Good	Yes	Yes	None
84	Female	Did not finish High School	Married	Home Maker	Very Good	No	Yes	None
49	Female	High School	Single	Employed full time	Fair	Yes	Yes	None
43	Female	College Graduate	Single	Un employed less than a year	Excellent	Yes	Yes	None
50	Female	College Graduate	Married	Employed full time	Very Good	Yes	Yes	None
72	Female	College Graduate	Married	Employed full time	Good	Yes	Yes	None
55	Female	College Graduate	Married	Employed full time	Very Good	Yes	Yes	None
50	Female	College Graduate	Married	Employed part time	Very Good	No	Yes	None
68	Female	College Graduate	Married	Retired	Fair	Yes	Yes	None
87	Male	Other	Married	Retired	Excellent	Yes	Yes	None
72	Female	Diploma	Married	Home Maker	Very Good	Yes	Yes	None
49	Female	College Graduate	Married	Employed full time	Good	Yes	Yes	None
57	Female	College Graduate	Married	Employed full time	Very Good	Yes	Yes	None
100	Female	primary School	Married	Home Maker	Fair	Yes	Yes	Vision screening
75	Female	primary School	Married	Home Maker	Very Good	Yes	Yes	Vision screening
87	Female	Did not finish High School	Married	Home Maker	Good	No	Yes	Vision screening
119	Male	primary School	Married	Employed part time	Good	Yes	Yes	None
117	Male	Did not finish High School	Married	Retired	Good	Yes	Yes	Vision screening
85	Female	Did not finish High School	Married	Home Maker	Good	Yes	Yes	Vision screening
77	Female	High School	Married	Employed full time	Good	Yes	Yes	None
74	Male	College Graduate	Married	Employed full time	Very Good	No	Yes	None
87	Female	High School	Married	Home Maker	Very Good	Yes	Yes	Vision screening
78	Male	College Graduate	Married	Un employed more than a year	Excellent	No	Yes	None
77	Female	High School	Married	Home Maker	Very Good	Yes	Yes	None
31	Female	High School	Single	Student	Excellent	Yes	Yes	Vision screening
61	Male	College Graduate	Married	Employed full time	Very Good	No	Yes	Vision screening
82	Female	College Graduate	Married	Home Maker	Good	No	Yes	Vision screening
50	Female	Diploma	Single	Home Maker	Very Good	Yes	Yes	None
85	Female	High School	Married	Home Maker	Excellent	Yes	Yes	Vision screening
74	Female	High School	Married	Home Maker	Excellent	No	Yes	None
85	Female	College Graduate	Single	Employed full time	Very Good	Yes	Yes	None
71	Male	primary School	Married	Employed part time	Excellent	Yes	Yes	None
42	Female	High School	Single	Home Maker	Very Good	Yes	Yes	None
54	Female	Diploma	Single	Home Maker	Excellent	No	Yes	None
72	Female	primary School	Married	Home Maker	Fair	No	Yes	None
49	Male	Did not finish High School	Single	Un employed less than a year	Good	Yes	Yes	Vision screening
50	Female	College Graduate	Married	Home Maker	Good	Yes	Yes	None
83	Female	Did not finish High School	Married	Employed full time	Very Good	No	Yes	None
59	Female	High School	Single	Un employed less than a year	Excellent	Yes	Yes	None
95	Female	Other	Married	Home Maker	Very Good	Yes	Yes	None
40	Female	High School	Single	Employed full time	Fair	Yes	Yes	None
40	Female	High School	Single	Student	Excellent	No	Yes	None
68	Male	Other	Married	Employed full time	Good	No	Yes	None
103	Male	Other	Married	Retired	Excellent	Yes	Yes	Vision screening
50	Male	College Graduate	Single	Employed part time	Good	Yes	Yes	None
90	Female	Other	Married	Home Maker	Very Good	Yes	Yes	None
71	Female	College Graduate	Married	Employed full time	Excellent	No	Yes	None
38	Male	College Graduate	Single	Student	Good	No	Yes	Vision screening
45	Female	primary School	Single	Un employed more than a year	Excellent	Yes	Yes	None
71	Female	College Graduate	Married	Employed full time	Good	Yes	Yes	Vision screening
64	Male	Diploma	Married	Employed full time	Excellent	Yes	Yes	None
54	Female	Other	Married	Employed full time	Good	No	Yes	None
89	Male	High School	Married	Employed part time	Excellent	No	Yes	Vision screening
47	Female	Master Graduate	Single	Student	Good	Yes	Yes	None
72	Female	College Graduate	Married	Employed part time	Good	Yes	Yes	None
77	Male	High School	Married	Retired	Very Good	Yes	Yes	None
61	Female	College Graduate	Married	Employed full time	Very Good	Yes	Yes	None
62	Female	High School	Single	Home Maker	Good	No	Yes	Vision screening
45	Male	College Graduate	Single	Un employed more than a year	Fair	No	Yes	None
73	Female	High School	Married	Retired	Excellent	Yes	Yes	None
57	Female	Diploma	Married	Employed full time	Good	No	Yes	None
112	Male	High School	Married	Retired	Excellent	Yes	Yes	Vision screening
56	Female	College Graduate	Married	Home Maker	Very Good	No	Yes	None
64	Male	Diploma	Married	Employed full time	Very Good	No	Yes	None
95	Female	primary School	Married	Home Maker	Fair	Yes	Yes	Vision screening
87	Male	High School	Married	Retired	Good	Yes	Yes	None
73	Male	Other	Married	Employed full time	Fair	No	Yes	Vision screening
64	Female	High School	Married	Home Maker	Good	No	Yes	None
62	Female	Diploma	Married	Employed full time	Good	No	Yes	None
69	Female	Diploma	Married	Employed full time	Good	No	Yes	None
110	Female	primary School	Married	Home Maker	Fair	Yes	Yes	None
127	Female	primary School	Married	Home Maker	Fair	Yes	Yes	Vision screening
123	Female	primary School	Married	Home Maker	Fair	Yes	Yes	Vision screening
97	Female	primary School	Married	Home Maker	Fair	Yes	Yes	Vision screening
91	Female	primary School	Married	Home Maker	Very Good	Yes	Yes	Vision screening
68	Female	Diploma	Married	Employed full time	Good	No	Yes	None
102	Female	primary School	Married	Home Maker	Poor	Yes	Yes	Vision screening
87	Female	College Graduate	Married	Retired	Fair	Yes	Yes	None
56	Female	High School	Married	Home Maker	Excellent	No	Yes	None
71	Male	Master Graduate	Married	Employed full time	Very Good	No	Yes	Vision screening
42	Female	High School	Single	Student	Fair	No	Yes	None
68	Female	High School	Single	Home Maker	Very Good	Yes	Yes	None
83	Female	High School	Married	Home Maker	Excellent	No	Yes	None
71	Female	High School	Married	Home Maker	Excellent	Yes	Yes	None
73	Male	Diploma	Married	Un employed more than a year	Good	Yes	Yes	Vision screening
84	Male	High School	Married	Employed full time	Excellent	Yes	Yes	None
82	Female	High School	Married	Home Maker	Excellent	Yes	Yes	None
38	Female	High School	Single	Student	Excellent	Yes	Yes	None
49	Female	Diploma	Single	Employed part time	Very Good	No	Yes	None
77	Male	Master Graduate	Married	Employed full time	Good	No	Yes	None
72	Female	primary School	Married	Home Maker	Good	No	Yes	None
47	Female	College Graduate	Single	Employed full time	Good	No	Yes	None
95	Female	Other	Married	Home Maker	Good	Yes	Yes	None
89	Male	primary School	Married	Employed part time	Good	Yes	Yes	None
95	Male	College Graduate	Married	Employed full time	Good	Yes	Yes	None
113	Male	Other	Married	Home Maker	Fair	No	Yes	None
73	Female	Other	Married	Home Maker	Excellent	No	Yes	None
84	Female	primary School	Married	Home Maker	Fair	Yes	Yes	None
86	Male	primary School	Single	Employed full time	Poor	Yes	Yes	None
87	Female	Did not finish High School	Married	Home Maker	Very Good	No	Yes	None
109	Male	High School	Married	Retired	Fair	Yes	Yes	None
60	Male	Other	Single	Employed part time	Very Good	Yes	Yes	None
34	Female	Did not finish High School	Single	Student	Very Good	Yes	Yes	None
82	Female	Other	Married	Employed full time	Very Good	Yes	Yes	Vision screening
68	Female	College Graduate	Married	Employed full time	Good	No	Yes	None
82	Female	Other	Married	Home Maker	Very Good	No	Yes	Vision screening
78	Male	College Graduate	Married	Employed full time	Very Good	Yes	Yes	None
100	Male	Other	Married	Retired	Good	Yes	Yes	Vision screening
86	Female	Other	Married	Home Maker	Very Good	No	Yes	None
77	Male	College Graduate	Married	Employed full time	Excellent	Yes	Yes	None
73	Male	Did not finish High School	Married	Retired	Very Good	Yes	Yes	None
108	Male	Diploma	Married	Retired	Very Good	Yes	Yes	None
119	Male	primary School	Married	Employed part time	Very Good	Yes	Yes	None
92	Male	Other	Single	Un employed more than a year	Good	No	Yes	None
40	Female	College Graduate	Single	Student	Excellent	No	Yes	None
63	Female	College Graduate	Married	Home Maker	Excellent	No	Yes	Vision screening
47	Male	College Graduate	Single	Employed full time	Very Good	Yes	Yes	None
88	Male	College Graduate	Married	Employed part time	Good	Yes	Yes	None
100	Female	High School	Single	Home Maker	Excellent	Yes	Yes	None
90	Male	primary School	Single	Home Maker	Very Good	No	Yes	None
43	Female	College Graduate	Single	Student	Good	No	Yes	None
38	Female	Other	Single	Un employed more than a year	Poor	Yes	Yes	None
91	Female	Other	Married	Home Maker	Good	Yes	Yes	None
40	Female	College Graduate	Single	Student	Fair	Yes	Yes	None
88	Female	Dectorate	Single	Employed full time	Excellent	No	Yes	None
102	Female	Master Graduate	Married	Retired	Good	Yes	Yes	None
75	Male	Master Graduate	Married	Employed full time	Very Good	Yes	Yes	None
70	Male	College Graduate	Married	Employed part time	Excellent	Yes	Yes	None
95	Male	College Graduate	Married	Retired	Excellent	Yes	Yes	None
70	Male	Diploma	Married	Employed full time	Good	Yes	Yes	None
82	Female	Other	Married	Home Maker	Good	Yes	Yes	None
82	Female	Other	Married	Home Maker	Good	Yes	Yes	None
82	Female	Other	Married	Home Maker	Very Good	No	Yes	None
96	Male	Other	Married	Retired	Fair	No	Yes	None
87	Male	Master Graduate	Married	Retired	Excellent	Yes	Yes	None
95	Male	Did not finish High School	Married	Retired	Excellent	Yes	Yes	None
35	Female	High School	Single	Student	Fair	Yes	Yes	Vision screening
74	Male	primary School	Married	Employed full time	Good	Yes	Yes	None
50	Male	primary School	Single	Employed part time	Very Good	Yes	Yes	None
68	Female	Diploma	Married	Home Maker	Good	No	Yes	None
49	Male	College Graduate	Single	Un employed more than a year	Fair	No	Yes	None
68	Female	Diploma	Married	Home Maker	Excellent	Yes	Yes	None
60	Male	High School	Married	Employed part time	Very Good	Yes	Yes	None
50	Male	Other	Single	Employed part time	Very Good	Yes	Yes	None
57	Male	High School	Married	Employed part time	Good	Yes	Yes	None
74	Female	College Graduate	Married	Home Maker	Good	No	Yes	None
72	Male	College Graduate	Married	Employed full time	Excellent	No	Yes	Vision screening
119	Male	primary School	Married	Retired	Good	Yes	Yes	Vision screening
89	Male	primary School	Married	Retired	Very Good	No	Yes	None
63	Female	High School	Married	Employed full time	Very Good	No	Yes	None
68	Female	Diploma	Married	Employed part time	Fair	Yes	Yes	Vision screening
100	Female	College Graduate	Single	Home Maker	Poor	Yes	Yes	None
97	Male	College Graduate	Married	Retired	Excellent	No	Yes	None
73	Female	Dectorate	Married	Home Maker	Very Good	Yes	Yes	None
77	Female	High School	Married	Home Maker	Very Good	Yes	Yes	None
74	Female	High School	Married	Employed full time	Very Good	Yes	Yes	Vision screening
87	Female	Dectorate	Married	Employed full time	Excellent	No	Yes	None
104	Male	High School	Married	Retired	Poor	Yes	Yes	None
68	Female	High School	Married	Employed part time	Excellent	Yes	Yes	None
108	Male	High School	Married	Retired	Very Good	Yes	Yes	Vision screening
88	Male	primary School	Married	Employed part time	Excellent	Yes	Yes	Vision screening
68	Male	Diploma	Married	Employed part time	Excellent	No	Yes	None
85	Female	primary School	Married	Home Maker	Very Good	Yes	Yes	None
60	Female	Other	Married	Employed part time	Fair	No	Yes	None
63	Female	Diploma	Married	Employed part time	Excellent	No	Yes	None
59	Male	College Graduate	Single	Employed full time	Good	No	Yes	None
82	Male	Other	Married	Employed full time	Excellent	Yes	Yes	Vision screening
68	Male	High School	Single	Employed part time	Very Good	Yes	Yes	None
86	Male	Did not finish High School	Married	Employed part time	Excellent	Yes	Yes	None
113	Male	Other	Married	Un employed due to an illness or disability	Fair	No	Yes	None
72	Female	College Graduate	Married	Home Maker	Fair	Yes	Yes	None
78	Female	primary School	Married	Home Maker	Good	Yes	Yes	Vision screening
68	Female	College Graduate	Married	Employed full time	Good	Yes	Yes	None
89	Male	Dectorate	Married	Employed full time	Excellent	Yes	Yes	None
77	Female	Diploma	Married	Employed full time	Good	No	Yes	None
91	Female	Did not finish High School	Married	Home Maker	Very Good	Yes	Yes	Vision screening
38	Male	Dectorate	Single	Employed full time	Very Good	Yes	Yes	None
54	Male	Other	Married	Employed part time	Very Good	Yes	Yes	None
72	Male	Did not finish High School	Married	Employed full time	Excellent	Yes	Yes	None
98	Male	College Graduate	Married	Un employed less than a year	Good	Yes	Yes	Vision screening
77	Female	College Graduate	Married	Employed full time	Very Good	Yes	Yes	None
87	Female	High School	Married	Home Maker	Very Good	No	Yes	None
103	Male	College Graduate	Married	Retired	Poor	Yes	Yes	None
75	Male	College Graduate	Married	Employed full time	Very Good	No	Yes	None
88	Female	College Graduate	Married	Retired	Very Good	Yes	Yes	None
59	Female	College Graduate	Married	Employed part time	Good	Yes	Yes	None
54	Female	High School	Married	Home Maker	Very Good	No	Yes	None
38	Female	Did not finish High School	Single	Home Maker	Poor	Yes	Yes	None
112	Female	primary School	Married	Home Maker	Good	Yes	Yes	None
62	Male	College Graduate	Single	Student	Excellent	No	Yes	None
68	Male	Did not finish High School	Single	Employed part time	Good	Yes	Yes	None
100	Male	Other	Married	Employed part time	Good	Yes	Yes	None
83	Female	High School	Single	Retired	Poor	No	Yes	None
57	Female	College Graduate	Married	Employed full time	Good	Yes	Yes	None
57	Female	College Graduate	Married	Home Maker	Good	No	Yes	None
59	Female	Other	Married	Employed part time	Excellent	Yes	Yes	None
40	Female	College Graduate	Single	Employed full time	Fair	No	Yes	None
104	Female	Other	Married	Home Maker	Fair	Yes	Yes	None
84	Female	Did not finish High School	Single	Home Maker	Very Good	Yes	Yes	None
112	Male	High School	Married	Retired	Very Good	Yes	Yes	Vision screening
90	Male	Other	Single	Employed part time	Very Good	Yes	Yes	None
59	Female	College Graduate	Married	Home Maker	Fair	No	Yes	None
71	Female	College Graduate	Married	Employed full time	Fair	Yes	Yes	None
50	Male	College Graduate	Single	Employed part time	Excellent	No	Yes	None
68	Female	College Graduate	Married	Employed part time	Very Good	No	Yes	None
42	Female	High School	Single	Student	Good	Yes	Yes	None
95	Female	primary School	Married	Home Maker	Very Good	Yes	Yes	Vision screening
61	Female	College Graduate	Married	Employed part time	Good	Yes	Yes	Vision screening
68	Male	College Graduate	Married	Un employed less than a year	Poor	Yes	Yes	Vision screening
55	Male	College Graduate	Single	Employed full time	Fair	No	Yes	None
63	Male	High School	Married	Employed full time	Good	Yes	Yes	None
86	Female	High School	Married	Home Maker	Very Good	Yes	Yes	None
99	Female	College Graduate	Married	Home Maker	Good	Yes	Yes	None
38	Female	High School	Single	Student	Fair	No	Yes	None
89	Male	Dectorate	Married	Retired	Very Good	Yes	Yes	Vision screening
69	Male	College Graduate	Married	Employed full time	Good	No	Yes	None
89	Male	College Graduate	Married	Retired	Very Good	Yes	Yes	None
96	Male	College Graduate	Married	Retired	Good	Yes	Yes	None
56	Female	High School	Single	Employed full time	Very Good	Yes	Yes	None
88	Male	Other	Married	Retired	Very Good	Yes	Yes	None
57	Female	College Graduate	Married	Employed full time	Good	Yes	Yes	None
74	Female	College Graduate	Married	Home Maker	Fair	Yes	Yes	None
72	Female	College Graduate	Married	Home Maker	Good	Yes	Yes	None
64	Female	College Graduate	Married	Home Maker	Fair	Yes	Yes	None
72	Female	High School	Married	Home Maker	Fair	No	Yes	Vision screening
46	Female	High School	Single	Student	Very Good	Yes	Yes	None
38	Female	High School	Single	Student	Excellent	Yes	Yes	None
71	Female	College Graduate	Married	Employed full time	Fair	Yes	Yes	None
45	Female	College Graduate	Single	Employed part time	Good	Yes	Yes	None
34	Female	Did not finish High School	Single	Student	Good	Yes	Yes	None
73	Male	College Graduate	Married	Employed part time	Very Good	No	Yes	None
59	Female	College Graduate	Single	Employed part time	Good	No	Yes	None
70	Female	College Graduate	Married	Employed full time	Very Good	No	Yes	Vision screening
84	Male	College Graduate	Married	Employed full time	Good	No	Yes	None
75	Female	College Graduate	Married	Employed full time	Good	No	Yes	None
77	Female	College Graduate	Married	Employed full time	Good	No	Yes	None
73	Female	Other	Married	Employed part time	Excellent	No	Yes	None
137	Female	Diploma	Married	Un employed less than a year	Very Good	Yes	Yes	None
71	Female	College Graduate	Married	Employed full time	Fair	Yes	Yes	Vision screening
60	Male	College Graduate	Married	Employed full time	Excellent	Yes	Yes	None
90	Female	Dectorate	Married	Employed full time	Good	Yes	Yes	None
85	Female	High School	Married	Retired	Excellent	Yes	Yes	Vision screening
101	Female	College Graduate	Single	Home Maker	Fair	Yes	Yes	None
71	Male	College Graduate	Married	Employed full time	Excellent	Yes	Yes	None
89	Female	College Graduate	Married	Home Maker	Good	Yes	Yes	None
110	Male	High School	Married	Retired	Excellent	Yes	Yes	Vision screening
49	Female	College Graduate	Single	Student	Excellent	Yes	Yes	None
89	Male	College Graduate	Single	Home Maker	Excellent	Yes	Yes	Vision screening
75	Male	College Graduate	Single	Retired	Excellent	Yes	Yes	Vision screening
69	Female	College Graduate	Married	Un employed more than a year	Very Good	No	Yes	Vision screening
35	Female	primary School	Single	Employed full time	Very Good	No	Yes	Vision screening
35	Female	High School	Single	Student	Fair	No	Yes	None
86	Male	High School	Married	Retired	Excellent	Yes	Yes	Vision screening
71	Female	High School	Married	Home Maker	Very Good	No	Yes	None
77	Male	College Graduate	Single	Retired	Fair	Yes	Yes	None
112	Male	College Graduate	Single	Retired	Excellent	Yes	Yes	None
68	Female	College Graduate	Married	Employed full time	Excellent	No	Yes	Vision screening
90	Male	Dectorate	Married	Retired	Good	No	Yes	Vision screening
87	Female	Master Graduate	Married	Home Maker	Fair	Yes	Yes	None
54	Female	College Graduate	Single	Home Maker	Very Good	Yes	Yes	None
113	Female	College Graduate	Single	Retired	Good	Yes	Yes	Vision screening
119	Male	Did not finish High School	Married	Retired	Good	Yes	Yes	Vision screening
54	Male	College Graduate	Single	Employed full time	Good	Yes	Yes	None
59	Male	College Graduate	Married	Un employed more than a year	Very Good	No	Yes	None
55	Male	College Graduate	Married	Employed full time	Excellent	Yes	Yes	None
44	Female	College Graduate	Single	Employed full time	Excellent	No	Yes	None
68	Female	Did not finish High School	Married	Employed part time	Good	No	Yes	None
50	Male	Master Graduate	Married	Employed full time	Excellent	Yes	Yes	None
54	Male	Other	Single	Employed full time	Good	No	Yes	None
74	Female	College Graduate	Married	Employed full time	Very Good	Yes	Yes	None
113	Female	Other	Married	Home Maker	Good	Yes	Yes	None
71	Male	College Graduate	Married	Employed full time	Good	No	Yes	None
84	Female	primary School	Married	Home Maker	Poor	Yes	Yes	None
86	Male	High School	Single	Employed full time	Good	Yes	Yes	None
82	Female	High School	Married	Home Maker	Excellent	No	Yes	None
57	Female	High School	Married	Home Maker	Excellent	No	Yes	None
82	Female	Master Graduate	Married	Employed full time	Good	No	Yes	None
97	Female	College Graduate	Married	Retired	Excellent	Yes	Yes	Vision screening
73	Female	Did not finish High School	Married	Employed part time	Excellent	Yes	Yes	None
84	Male	Dectorate	Married	Retired	Good	Yes	Yes	None
61	Male	Diploma	Married	Employed full time	Very Good	Yes	Yes	None
68	Female	College Graduate	Married	Employed part time	Good	No	Yes	None
96	Male	Diploma	Married	Retired	Very Good	No	Yes	None
56	Female	College Graduate	Married	Employed full time	Good	Yes	Yes	None
89	Female	High School	Single	Home Maker	Very Good	Yes	Yes	None
54	Female	College Graduate	Married	Employed part time	Fair	No	Yes	None
68	Female	College Graduate	Married	Employed part time	Fair	No	Yes	None
99	Male	Did not finish High School	Married	Retired	Poor	No	Yes	None
44	Male	College Graduate	Single	Employed full time	Very Good	Yes	Yes	None
71	Male	Did not finish High School	Married	Employed part time	Good	Yes	Yes	None
90	Male	College Graduate	Married	Retired	Fair	Yes	Yes	None
69	Male	College Graduate	Married	Employed full time	Good	Yes	Yes	None
44	Female	College Graduate	Single	Employed full time	Very Good	No	Yes	None
50	Male	Master Graduate	Single	Employed full time	Good	No	Yes	None
73	Female	High School	Single	Home Maker	Excellent	Yes	Yes	None
56	Female	College Graduate	Married	Home Maker	Very Good	No	Yes	None
40	Female	College Graduate	Single	Student	Excellent	Yes	Yes	None
54	Female	College Graduate	Married	Employed full time	Excellent	No	Yes	None
47	Female	College Graduate	Single	Home Maker	Excellent	No	Yes	Vision screening
64	Male	High School	Married	Employed full time	Excellent	Yes	Yes	None
89	Female	College Graduate	Single	Employed full time	Fair	Yes	Yes	Vision screening
73	Female	High School	Married	Home Maker	Excellent	No	Yes	None
70	Male	High School	Single	Employed full time	Good	Yes	Yes	None
71	Female	High School	Single	Home Maker	Fair	Yes	Yes	None
98	Male	Dectorate	Married	Retired	Very Good	Yes	Yes	Vision screening
99	Female	primary School	Single	Home Maker	Very Good	Yes	Yes	None
45	Female	Did not finish High School	Single	Employed full time	Fair	Yes	Yes	None
38	Male	High School	Single	Student	Good	Yes	Yes	None
43	Female	High School	Single	Student	Fair	No	Yes	None
111	Male	Dectorate	Married	Retired	Excellent	Yes	Yes	Vision screening
113	Female	High School	Married	Retired	Poor	Yes	Yes	None
38	Male	High School	Single	Employed full time	Excellent	Yes	Yes	None
47	Female	High School	Single	Student	Excellent	No	Yes	None
95	Female	High School	Married	Home Maker	Very Good	No	Yes	None
98	Female	Other	Married	Home Maker	Good	No	Yes	None
43	Female	High School	Single	Student	Excellent	Yes	Yes	None
27	Female	primary School	Single	Student	Very Good	Yes	Yes	None
38	Female	College Graduate	Married	Employed part time	Good	No	Yes	None
68	Female	College Graduate	Married	Employed full time	Good	Yes	Yes	None
31	Female	High School	Single	Home Maker	Poor	Yes	Yes	None
61	Male	Did not finish High School	Married	Employed part time	Good	Yes	Yes	None
44	Female	Dectorate	Married	Student	Fair	Yes	Yes	None
54	Male	High School	Married	Employed full time	Good	Yes	Yes	None
78	Female	Did not finish High School	Single	Employed full time	Good	Yes	Yes	None
50	Male	Master Graduate	Single	Employed full time	Very Good	No	Yes	None
135	Male	College Graduate	Married	Employed full time	Excellent	No	Yes	None
40	Male	High School	Married	Employed full time	Excellent	No	Yes	None
55	Male	College Graduate	Married	Employed full time	Excellent	No	Yes	None
112	Male	Dectorate	Single	Employed full time	Good	Yes	Yes	Vision screening
77	Female	Diploma	Married	Employed full time	Good	No	Yes	None
87	Female	High School	Married	Home Maker	Very Good	No	Yes	None
50	Male	College Graduate	Single	Home Maker	Good	Yes	Yes	None
74	Female	Dectorate	Married	Employed full time	Excellent	No	Yes	None
82	Female	Other	Married	Home Maker	Good	No	Yes	None
75	Male	College Graduate	Married	Employed full time	Very Good	Yes	Yes	None
96	Female	Other	Married	Home Maker	Good	No	Yes	None
57	Male	Did not finish High School	Married	Employed full time	Very Good	Yes	Yes	None
61	Female	primary School	Married	Home Maker	Excellent	Yes	Yes	None
50	Female	High School	Single	Home Maker	Very Good	No	Yes	None
87	Female	Master Graduate	Married	Retired	Excellent	Yes	Yes	None
78	Female	Other	Married	Home Maker	Good	Yes	Yes	None
71	Male	primary School	Single	Employed full time	Fair	Yes	Yes	Vision screening
99	Female	Dectorate	Married	Home Maker	Very Good	Yes	Yes	Vision screening
68	Male	Did not finish High School	Married	Employed part time	Excellent	Yes	Yes	None
83	Male	Dectorate	Married	Employed full time	Excellent	Yes	Yes	None
71	Male	Did not finish High School	Married	Employed full time	Excellent	Yes	Yes	None
68	Male	High School	Married	Employed full time	Excellent	No	Yes	None
42	Female	Did not finish High School	Single	Student	Fair	No	Yes	None
82	Male	Other	Married	Retired	Very Good	Yes	Yes	None
69	Male	Master Graduate	Married	Employed part time	Very Good	No	Yes	None
73	Female	College Graduate	Married	Employed full time	Poor	No	Yes	Vision screening
68	Female	College Graduate	Married	Employed part time	Good	Yes	Yes	None
95	Female	Dectorate	Married	Retired	Fair	Yes	Yes	None
82	Male	High School	Married	Employed full time	Good	Yes	Yes	None
27	Female	High School	Single	Home Maker	Good	Yes	Yes	None
82	Female	College Graduate	Married	Employed part time	Fair	No	Yes	None
28	Female	primary School	Single	Employed part time	Poor	Yes	Yes	None
24	Female	primary School	Single	Employed part time	Good	Yes	Yes	None
61	Female	College Graduate	Married	Student	Poor	No	Yes	Vision screening
36	Female	Did not finish High School	Married	Employed part time	Poor	Yes	Yes	None
35	Female	Did not finish High School	Married	Student	Fair	Yes	Yes	None
82	Female	primary School	Married	Home Maker	Good	Yes	Yes	None
89	Male	High School	Single	Employed part time	Good	Yes	Yes	None
72	Male	High School	Single	Employed part time	Good	Yes	Yes	None
140	Female	Master Graduate	Married	Un employed less than a year	Fair	Yes	Yes	None
82	Female	High School	Married	Home Maker	Good	Yes	Yes	None
68	Female	High School	Married	Home Maker	Good	Yes	Yes	None
56	Female	High School	Married	Home Maker	Very Good	No	Yes	None
57	Female	primary School	Married	Home Maker	Fair	Yes	Yes	None
45	Female	College Graduate	Married	Employed full time	Excellent	No	Yes	None
110	Male	Master Graduate	Married	Retired	Poor	Yes	Yes	None
59	Male	Master Graduate	Married	Employed full time	Excellent	No	Yes	None
54	Male	College Graduate	Single	Un employed more than a year	Good	No	Yes	None
121	Male	High School	Married	Retired	Very Good	Yes	Yes	None
77	Male	College Graduate	Single	Employed full time	Excellent	No	Yes	None
98	Male	Dectorate	Single	Employed full time	Excellent	Yes	Yes	None
36	Male	Diploma	Married	Employed part time	Fair	Yes	Yes	None
83	Male	College Graduate	Married	Un employed due to an illness or disability	Poor	Yes	Yes	None
73	Male	Master Graduate	Married	Employed part time	Fair	No	Yes	None
101	Male	Dectorate	Married	Retired	Fair	Yes	Yes	None
24	Male	primary School	Single	Retired	Poor	Yes	Yes	None
50	Female	College Graduate	Married	Employed full time	Good	Yes	Yes	None
102	Male	Other	Married	Retired	Very Good	Yes	Yes	None
36	Female	High School	Single	Student	Fair	Yes	Yes	None
84	Female	Master Graduate	Married	Employed full time	Good	Yes	Yes	None
57	Female	College Graduate	Single	Employed full time	Very Good	No	Yes	None
43	Male	College Graduate	Single	Student	Very Good	No	Yes	None
56	Female	College Graduate	Married	Employed part time	Excellent	No	Yes	None
63	Female	Diploma	Married	Un employed more than a year	Very Good	No	Yes	Vision screening
38	Male	High School	Married	Employed part time	Fair	Yes	Yes	None
71	Male	College Graduate	Married	Employed part time	Excellent	No	Yes	None
64	Male	Did not finish High School	Married	Employed full time	Good	Yes	Yes	None
55	Male	College Graduate	Single	Employed full time	Excellent	No	Yes	None
123	Female	High School	Married	Home Maker	Fair	Yes	Yes	None
64	Male	College Graduate	Single	Employed full time	Excellent	No	Yes	None
89	Male	Dectorate	Single	Employed full time	Excellent	Yes	Yes	None
85	Male	College Graduate	Married	Retired	Very Good	No	Yes	None
56	Female	College Graduate	Single	Employed full time	Excellent	Yes	Yes	None
102	Male	College Graduate	Single	Employed full time	Poor	Yes	Yes	None
100	Male	High School	Married	Retired	Good	Yes	Yes	None
100	Male	High School	Married	Retired	Good	Yes	Yes	None
104	Female	primary School	Married	Home Maker	Fair	Yes	Yes	Vision screening
62	Female	High School	Married	Home Maker	Fair	Yes	Yes	None
71	Male	Master Graduate	Married	Student	Very Good	Yes	Yes	None
72	Female	Master Graduate	Married	Employed full time	Good	No	Yes	None
73	Female	Dectorate	Married	Employed full time	Good	Yes	Yes	None
73	Female	Dectorate	Married	Employed full time	Good	Yes	Yes	None
100	Female	primary School	Married	Home Maker	Good	Yes	Yes	None
100	Female	primary School	Married	Home Maker	Very Good	Yes	Yes	None
83	Male	Master Graduate	Married	Un employed less than a year	Good	Yes	Yes	None
83	Male	Master Graduate	Married	Un employed less than a year	Good	Yes	Yes	None
82	Female	Did not finish High School	Single	Un employed more than a year	Good	No	Yes	None
49	Male	High School	Single	Employed full time	Very Good	No	Yes	None
103	Male	College Graduate	Married	Retired	Good	Yes	Yes	None
70	Female	High School	Married	Home Maker	Very Good	No	Yes	None
91	Male	Dectorate	Married	Employed full time	Fair	Yes	Yes	None
110	Male	Other	Married	Retired	Fair	Yes	Yes	None
68	Male	College Graduate	Married	Employed full time	Very Good	No	Yes	None
82	Female	Did not finish High School	Married	Home Maker	Very Good	No	Yes	None
68	Male	High School	Married	Employed full time	Excellent	Yes	Yes	None
88	Female	primary School	Married	Home Maker	Very Good	Yes	Yes	None
99	Male	Did not finish High School	Married	Retired	Very Good	Yes	Yes	None
46	Male	High School	Single	Employed full time	Very Good	No	Yes	None
95	Female	Other	Married	Home Maker	Very Good	Yes	Yes	None
57	Female	High School	Married	Home Maker	Very Good	No	Yes	None
90	Male	College Graduate	Married	Retired	Good	Yes	Yes	None
90	Male	Master Graduate	Married	Retired	Good	Yes	Yes	None
84	Female	College Graduate	Married	Home Maker	Good	No	Yes	None
83	Male	College Graduate	Married	Retired	Good	Yes	Yes	None
62	Female	College Graduate	Married	Employed full time	Good	No	Yes	None
89	Male	High School	Married	Employed full time	Good	Yes	Yes	None
50	Female	College Graduate	Married	Home Maker	Good	No	Yes	None
57	Male	High School	Single	Employed full time	Excellent	No	Yes	Vision screening
73	Female	primary School	Married	Home Maker	Very Good	Yes	Yes	None
71	Male	High School	Married	Employed full time	Very Good	Yes	Yes	None
95	Male	primary School	Married	Retired	Very Good	Yes	Yes	None
90	Male	High School	Married	Retired	Very Good	No	Yes	None
85	Female	primary School	Married	Home Maker	Very Good	Yes	Yes	None
56	Female	High School	Single	Employed full time	Excellent	No	Yes	None
60	Female	College Graduate	Married	Home Maker	Very Good	No	Yes	None
83	Male	High School	Married	Employed full time	Excellent	No	Yes	None
108	Female	High School	Married	Retired	Very Good	Yes	Yes	None
101	Female	College Graduate	Married	Home Maker	Good	Yes	Yes	None
101	Female	College Graduate	Married	Home Maker	Very Good	Yes	Yes	None
88	Male	Dectorate	Married	Retired	Very Good	No	Yes	None
72	Female	College Graduate	Single	Home Maker	Very Good	No	Yes	None
72	Female	College Graduate	Single	Home Maker	Fair	No	Yes	None
75	Male	College Graduate	Married	Employed full time	Very Good	Yes	Yes	None
110	Female	primary School	Single	Retired	Fair	Yes	Yes	Vision screening
57	Female	High School	Married	Home Maker	Fair	No	Yes	None
98	Male	College Graduate	Married	Employed full time	Excellent	Yes	Yes	None
64	Female	College Graduate	Married	Employed part time	Very Good	No	Yes	None
50	Female	College Graduate	Married	Home Maker	Fair	No	Yes	None
54	Female	College Graduate	Single	Employed full time	Very Good	No	Yes	None
64	Female	High School	Married	Home Maker	Very Good	No	Yes	None
122	Male	primary School	Single	Home Maker	Poor	Yes	Yes	None
49	Female	College Graduate	Single	Employed full time	Fair	No	Yes	None
73	Male	College Graduate	Married	Employed full time	Good	No	Yes	None
57	Female	High School	Married	Employed part time	Very Good	No	Yes	None
85	Female	High School	Married	Home Maker	Very Good	No	Yes	None
54	Female	College Graduate	Married	Employed full time	Very Good	No	Yes	None
49	Male	High School	Married	Student	Excellent	No	Yes	None
57	Female	College Graduate	Married	Employed full time	Good	No	Yes	None
71	Female	High School	Married	Home Maker	Very Good	No	Yes	None
62	Female	College Graduate	Married	Employed part time	Good	No	Yes	None
49	Female	College Graduate	Married	Employed part time	Good	No	Yes	None
73	Female	College Graduate	Married	Un employed due to an illness or disability	Very Good	No	Yes	None
60	Male	College Graduate	Married	Employed full time	Very Good	No	Yes	None
78	Female	College Graduate	Married	Employed full time	Excellent	Yes	Yes	None
97	Female	primary School	Married	Home Maker	Fair	Yes	Yes	None
97	Male	College Graduate	Married	Retired	Good	No	Yes	None
59	Female	College Graduate	Married	Employed part time	Fair	No	Yes	None
78	Female	College Graduate	Married	Employed full time	Fair	Yes	Yes	None
60	Female	College Graduate	Married	Employed full time	Very Good	No	Yes	Vision screening
84	Male	primary School	Married	Retired	Good	No	Yes	None
44	Male	Did not finish High School	Single	Employed full time	Very Good	Yes	Yes	None
59	Female	High School	Married	Home Maker	Good	No	Yes	None
59	Female	High School	Married	Un employed less than a year	Good	Yes	Yes	Vision screening
86	Female	primary School	Married	Home Maker	Good	Yes	Yes	None
62	Male	Did not finish High School	Married	Un employed less than a year	Excellent	Yes	Yes	None
99	Male	College Graduate	Married	Retired	Very Good	Yes	Yes	None
97	Female	High School	Married	Retired	Good	Yes	Yes	None
47	Female	Diploma	Married	Home Maker	Fair	Yes	Yes	None
64	Male	High School	Married	Employed full time	Very Good	Yes	Yes	None
54	Male	Did not finish High School	Single	Employed full time	Very Good	Yes	Yes	None
57	Female	High School	Married	Home Maker	Very Good	No	Yes	None
50	Male	College Graduate	Married	Employed full time	Good	Yes	Yes	None
90	Male	Other	Married	Employed full time	Very Good	Yes	Yes	None
95	Female	Other	Married	Home Maker	Very Good	Yes	Yes	None
91	Male	High School	Married	Retired	Very Good	Yes	Yes	None
68	Male	College Graduate	Married	Employed full time	Very Good	Yes	Yes	None
59	Male	Diploma	Married	Employed full time	Very Good	Yes	Yes	None
71	Female	Master Graduate	Married	Employed part time	Excellent	No	Yes	None
100	Male	High School	Married	Retired	Good	Yes	Yes	None
103	Female	Other	Married	Home Maker	Good	Yes	Yes	None
97	Male	High School	Married	Retired	Good	Yes	Yes	Vision screening
77	Female	College Graduate	Married	Employed full time	Good	No	Yes	None
86	Female	College Graduate	Married	Home Maker	Very Good	Yes	Yes	None
74	Female	College Graduate	Married	Home Maker	Very Good	Yes	Yes	None
84	Female	College Graduate	Married	Home Maker	Very Good	No	Yes	Vision screening
72	Male	Master Graduate	Married	Employed full time	Good	Yes	Yes	None
87	Male	High School	Single	Retired	Good	No	Yes	None
43	Female	High School	Single	Student	Excellent	No	Yes	None
70	Male	College Graduate	Married	Employed full time	Excellent	No	Yes	None
71	Male	Master Graduate	Married	Employed full time	Good	No	Yes	None
57	Female	High School	Married	Home Maker	Excellent	No	Yes	Vision screening
71	Female	Diploma	Married	Employed full time	Fair	No	Yes	None
73	Female	Diploma	Married	Employed full time	Fair	No	Yes	None
46	Female	College Graduate	Married	Home Maker	Good	Yes	Yes	None
123	Male	Other	Married	Retired	Poor	Yes	Yes	None
100	Male	College Graduate	Married	Retired	Very Good	Yes	Yes	None
86	Male	High School	Married	Employed full time	Fair	No	Yes	None
83	Female	College Graduate	Married	Employed full time	Fair	Yes	Yes	None
96	Male	primary School	Married	Retired	Very Good	No	Yes	None
90	Female	primary School	Married	Home Maker	Good	No	Yes	None
90	Female	Did not finish High School	Married	Home Maker	Excellent	Yes	Yes	None
77	Male	Master Graduate	Single	Employed full time	Excellent	No	Yes	None
98	Female	Did not finish High School	Married	Home Maker	Excellent	Yes	Yes	None
110	Male	College Graduate	Married	Retired	Very Good	Yes	Yes	None
85	Male	College Graduate	Married	Retired	Excellent	No	Yes	None
91	Male	College Graduate	Married	Retired	Very Good	Yes	Yes	None
98	Male	College Graduate	Married	Retired	Good	Yes	Yes	None
75	Male	College Graduate	Married	Employed full time	Very Good	No	Yes	None
62	Female	Master Graduate	Married	Employed full time	Good	Yes	Yes	Vision screening
24	Female	primary School	Single	Student	Fair	Yes	Yes	None
89	Female	Other	Married	Home Maker	Very Good	Yes	Yes	None
91	Male	College Graduate	Married	Retired	Very Good	Yes	Yes	None
24	Male	primary School	Single	Student	Poor	Yes	Yes	None
91	Male	College Graduate	Married	Retired	Fair	Yes	Yes	None
28	Female	primary School	Single	Student	Good	No	Yes	None
98	Male	High School	Married	Retired	Good	Yes	Yes	None
101	Female	primary School	Married	Home Maker	Good	Yes	Yes	None
113	Female	Did not finish High School	Married	Home Maker	Very Good	Yes	Yes	None
68	Female	Diploma	Married	Employed full time	Very Good	Yes	Yes	Vision screening
82	Male	primary School	Single	Employed full time	Very Good	Yes	Yes	None
73	Female	High School	Married	Employed part time	Very Good	Yes	Yes	None
73	Female	College Graduate	Married	Employed full time	Good	No	Yes	None
59	Male	Master Graduate	Married	Employed full time	Good	No	Yes	None
78	Female	College Graduate	Married	Employed full time	Good	No	Yes	None
70	Male	College Graduate	Married	Un employed less than a year	Very Good	Yes	Yes	Vision screening
89	Male	Did not finish High School	Married	Un employed more than a year	Very Good	Yes	Yes	None
50	Female	College Graduate	Married	Employed part time	Very Good	No	Yes	None
57	Female	Master Graduate	Married	Employed full time	Very Good	No	Yes	None
38	Female	College Graduate	Married	Employed part time	Poor	No	Yes	None
50	Female	College Graduate	Married	Employed full time	Good	No	Yes	None
49	Female	College Graduate	Married	Employed full time	Good	No	Yes	None
85	Male	College Graduate	Married	Employed full time	Fair	No	Yes	None
49	Female	College Graduate	Single	Employed full time	Fair	No	Yes	None
74	Male	College Graduate	Married	Employed full time	Very Good	No	Yes	None
40	Female	High School	Married	Student	Fair	Yes	Yes	None
61	Female	College Graduate	Married	Employed full time	Good	No	Yes	None
75	Female	High School	Married	Un employed less than a year	Poor	No	Yes	None
43	Female	College Graduate	Single	Un employed less than a year	Fair	Yes	Yes	None
96	Male	College Graduate	Married	Retired	Very Good	No	Yes	None
60	Female	College Graduate	Married	Employed full time	Excellent	No	Yes	None
47	Female	College Graduate	Married	Employed full time	Very Good	No	Yes	None
95	Female	primary School	Married	Home Maker	Very Good	Yes	Yes	None
61	Female	College Graduate	Single	Employed part time	Good	Yes	Yes	None
97	Male	primary School	Married	Retired	Good	No	Yes	None
97	Male	College Graduate	Married	Retired	Very Good	No	Yes	None
60	Male	College Graduate	Married	Employed full time	Very Good	No	Yes	Vision screening
77	Female	College Graduate	Married	Student	Very Good	No	Yes	None
60	Female	High School	Married	Home Maker	Very Good	Yes	Yes	None
54	Female	College Graduate	Married	Home Maker	Very Good	Yes	Yes	None
44	Female	High School	Married	Home Maker	Excellent	Yes	Yes	None
54	Female	College Graduate	Married	Home Maker	Very Good	Yes	Yes	None
34	Male	High School	Single	Student	Very Good	Yes	Yes	None
77	Male	College Graduate	Married	Employed full time	Fair	No	Yes	None
98	Female	primary School	Married	Home Maker	Very Good	No	Yes	None
109	Male	primary School	Married	Retired	Very Good	No	Yes	None
96	Male	College Graduate	Married	Employed full time	Excellent	Yes	Yes	None
88	Male	College Graduate	Married	Employed full time	Excellent	Yes	Yes	None
57	Male	College Graduate	Single	Employed full time	Excellent	Yes	Yes	None
100	Female	High School	Married	Home Maker	Good	Yes	Yes	None
83	Male	College Graduate	Married	Employed full time	Fair	Yes	Yes	None
95	Female	primary School	Married	Home Maker	Very Good	Yes	Yes	Vision screening
99	Female	primary School	Married	Home Maker	Very Good	Yes	Yes	None
131	Female	College Graduate	Single	Home Maker	Poor	Yes	Yes	None
108	Male	Other	Married	Retired	Very Good	Yes	Yes	None
60	Female	College Graduate	Married	Employed full time	Good	Yes	Yes	None
72	Female	Other	Married	Home Maker	Very Good	Yes	Yes	None
88	Male	Other	Married	Employed full time	Good	Yes	Yes	None
97	Male	Dectorate	Single	Employed full time	Excellent	No	Yes	None
77	Female	College Graduate	Married	Employed full time	Poor	Yes	Yes	None
43	Female	College Graduate	Single	Student	Fair	No	Yes	None
71	Male	Other	Married	Employed full time	Good	Yes	Yes	None
89	Female	Other	Married	Home Maker	Excellent	Yes	Yes	None
113	Female	Other	Married	Un employed more than a year	Very Good	Yes	Yes	None
95	Female	High School	Single	Retired	Good	Yes	Yes	None
86	Male	College Graduate	Married	Employed full time	Good	Yes	Yes	None
68	Male	Did not finish High School	Married	Employed part time	Very Good	Yes	Yes	None
115	Male	Master Graduate	Married	Retired	Good	Yes	Yes	Vision screening
100	Female	Did not finish High School	Married	Retired	Fair	Yes	Yes	None
73	Female	Master Graduate	Married	Employed full time	Fair	Yes	Yes	None
108	Male	College Graduate	Married	Retired	Very Good	Yes	Yes	None
73	Female	College Graduate	Married	Employed full time	Fair	No	Yes	None
86	Female	College Graduate	Married	Employed part time	Fair	No	Yes	None
82	Male	Master Graduate	Married	Employed full time	Good	Yes	Yes	None
95	Male	High School	Married	Retired	Excellent	No	Yes	None
77	Female	primary School	Married	Home Maker	Fair	Yes	Yes	None
62	Female	Other	Single	Employed part time	Good	No	Yes	None
116	Male	College Graduate	Married	Retired	Fair	Yes	Yes	None
62	Female	College Graduate	Married	Employed full time	Fair	No	Yes	None
49	Female	College Graduate	Married	Employed part time	Good	No	Yes	None
71	Female	Diploma	Married	Employed full time	Very Good	No	Yes	None
72	Female	Did not finish High School	Married	Home Maker	Excellent	No	Yes	None
86	Female	Other	Married	Home Maker	Good	No	Yes	None
87	Male	College Graduate	Married	Employed full time	Fair	Yes	Yes	None
91	Male	College Graduate	Married	Employed full time	Fair	Yes	Yes	Vision screening
99	Male	College Graduate	Married	Retired	Very Good	No	Yes	None
91	Female	Diploma	Married	Retired	Very Good	No	Yes	None
60	Male	College Graduate	Married	Employed part time	Excellent	Yes	Yes	None
109	Male	Master Graduate	Married	Retired	Very Good	No	Yes	None
75	Female	Diploma	Married	Employed full time	Excellent	Yes	Yes	None
86	Female	High School	Married	Home Maker	Very Good	No	Yes	None
98	Male	Did not finish High School	Married	Retired	Good	Yes	Yes	Vision screening
71	Male	College Graduate	Married	Employed full time	Very Good	No	Yes	None
124	Male	College Graduate	Single	Retired	Poor	Yes	Yes	Vision screening
89	Female	Dectorate	Single	Employed full time	Very Good	No	Yes	None
84	Female	Other	Married	Home Maker	Good	No	Yes	None
100	Female	Other	Married	Home Maker	Very Good	No	Yes	None
95	Female	College Graduate	Single	Employed full time	Excellent	Yes	Yes	None
110	Male	College Graduate	Single	Retired	Fair	Yes	Yes	None
86	Male	Diploma	Married	Employed full time	Very Good	No	Yes	None
69	Female	Master Graduate	Single	Employed full time	Excellent	Yes	Yes	Vision screening
90	Male	Dectorate	Married	Employed full time	Excellent	No	Yes	None
45	Female	College Graduate	Single	Student	Good	Yes	Yes	Vision screening
87	Male	College Graduate	Married	Employed full time	Poor	Yes	Yes	None
86	Female	Dectorate	Married	Employed full time	Fair	No	Yes	None
61	Female	College Graduate	Married	Home Maker	Fair	No	Yes	None
59	Female	College Graduate	Married	Home Maker	Good	No	Yes	None
88	Male	College Graduate	Single	Un employed less than a year	Very Good	Yes	Yes	None
86	Female	Diploma	Married	Retired	Very Good	No	Yes	None
50	Female	College Graduate	Married	Un employed more than a year	Very Good	Yes	Yes	None
49	Female	Diploma	Married	Home Maker	Fair	Yes	Yes	None
115	Female	High School	Married	Home Maker	Very Good	No	Yes	None
83	Female	primary School	Married	Home Maker	Fair	Yes	Yes	None
102	Male	College Graduate	Married	Retired	Very Good	No	Yes	None
101	Male	Master Graduate	Married	Retired	Very Good	Yes	Yes	None
89	Female	Other	Married	Un employed more than a year	Good	No	Yes	None
91	Male	Other	Married	Retired	Good	No	Yes	None
96	Male	Other	Married	Retired	Very Good	Yes	Yes	None
119	Female	primary School	Married	Home Maker	Good	Yes	Yes	None
85	Male	College Graduate	Married	Employed full time	Good	No	Yes	None
91	Female	High School	Married	Home Maker	Fair	No	Yes	None
103	Female	College Graduate	Married	Retired	Fair	Yes	Yes	None
75	Female	primary School	Married	Home Maker	Fair	Yes	Yes	None
47	Female	High School	Single	Employed full time	Excellent	Yes	Yes	None
121	Female	College Graduate	Married	Retired	Good	Yes	Yes	None
99	Male	primary School	Married	Employed full time	Good	Yes	Yes	None
75	Male	High School	Married	Retired	Excellent	No	Yes	None
85	Male	High School	Married	Retired	Fair	Yes	Yes	None
71	Male	College Graduate	Married	Employed full time	Fair	Yes	Yes	None
70	Male	College Graduate	Married	Employed full time	Very Good	Yes	Yes	None
95	Male	High School	Married	Employed part time	Fair	Yes	Yes	None
42	Female	High School	Single	Student	Excellent	No	Yes	None
99	Female	Dectorate	Married	Retired	Good	No	Yes	None
113	Female	Other	Married	Home Maker	Very Good	Yes	Yes	None
82	Female	Other	Married	Home Maker	Very Good	Yes	Yes	None
85	Female	Other	Married	Home Maker	Very Good	Yes	Yes	None
29	Male	High School	Single	Student	Fair	Yes	Yes	None
78	Male	High School	Single	Employed full time	Excellent	Yes	Yes	Vision screening
72	Male	High School	Married	Employed full time	Very Good	Yes	Yes	None
82	Female	College Graduate	Married	Home Maker	Very Good	No	Yes	None
68	Female	Master Graduate	Married	Employed full time	Excellent	Yes	Yes	None
74	Male	College Graduate	Single	Employed full time	Excellent	Yes	Yes	None
40	Male	High School	Single	Home Maker	Good	Yes	Yes	None
62	Female	College Graduate	Married	Employed full time	Very Good	Yes	Yes	None
57	Female	College Graduate	Married	Employed full time	Very Good	No	Yes	None
50	Female	College Graduate	Married	Employed full time	Good	No	Yes	None
97	Male	Other	Married	Retired	Good	No	Yes	None
56	Male	Other	Married	Employed full time	Excellent	Yes	Yes	None
49	Male	Master Graduate	Single	Employed full time	Good	No	Yes	None
84	Male	primary School	Married	Retired	Fair	Yes	Yes	None
49	Female	Did not finish High School	Single	Student	Good	No	Yes	None
57	Male	College Graduate	Married	Employed part time	Very Good	No	Yes	None
61	Female	College Graduate	Married	Employed full time	Fair	No	Yes	None
45	Female	College Graduate	Single	Employed full time	Very Good	Yes	Yes	None
95	Female	College Graduate	Married	Home Maker	Good	Yes	Yes	None
83	Female	Dectorate	Married	Employed full time	Very Good	Yes	Yes	None
49	Female	Other	Married	Home Maker	Very Good	Yes	Yes	None
68	Female	Did not finish High School	Married	Employed full time	Excellent	Yes	Yes	None
45	Female	College Graduate	Single	Employed full time	Excellent	Yes	Yes	None
90	Female	Diploma	Single	Employed full time	Very Good	No	Yes	None
68	Female	College Graduate	Married	Employed full time	Very Good	Yes	Yes	None
102	Female	College Graduate	Married	Retired	Fair	Yes	Yes	None
88	Female	primary School	Married	Home Maker	Good	Yes	Yes	None
60	Female	College Graduate	Married	Employed full time	Fair	No	Yes	None
83	Female	Other	Married	Home Maker	Good	Yes	Yes	None
97	Male	High School	Married	Retired	Good	Yes	Yes	None
99	Male	Master Graduate	Married	Retired	Good	No	Yes	None
88	Female	primary School	Married	Home Maker	Good	Yes	Yes	None
84	Female	College Graduate	Married	Employed full time	Fair	Yes	Yes	None
88	Female	Other	Married	Home Maker	Very Good	No	Yes	None
99	Female	Other	Married	Home Maker	Good	Yes	Yes	None
98	Female	Other	Married	Home Maker	Good	Yes	Yes	None
95	Male	College Graduate	Married	Retired	Fair	Yes	Yes	None
64	Male	primary School	Married	Employed full time	Good	Yes	Yes	None
116	Male	Diploma	Married	Retired	Good	No	Yes	None
90	Male	Other	Married	Employed full time	Good	Yes	Yes	None
116	Male	Diploma	Married	Retired	Good	No	Yes	None
116	Male	Diploma	Married	Retired	Good	No	Yes	None
97	Female	Other	Married	Home Maker	Good	Yes	Yes	None
86	Male	primary School	Married	Employed full time	Fair	Yes	Yes	None
83	Male	College Graduate	Married	Employed full time	Fair	Yes	Yes	None
71	Male	College Graduate	Married	Employed full time	Fair	Yes	Yes	None
97	Female	primary School	Married	Retired	Fair	Yes	Yes	None
95	Male	College Graduate	Married	Retired	Good	Yes	Yes	None
78	Female	Other	Married	Home Maker	Good	No	Yes	None
109	Female	Other	Married	Home Maker	Very Good	Yes	Yes	None
73	Female	Other	Married	Home Maker	Fair	No	Yes	None
91	Male	Other	Married	Employed full time	Good	Yes	Yes	None
97	Female	primary School	Married	Home Maker	Fair	Yes	Yes	None
72	Female	College Graduate	Married	Employed part time	Excellent	No	Yes	None
73	Female	College Graduate	Married	Employed full time	Good	Yes	Yes	None
54	Male	High School	Married	Employed full time	Very Good	Yes	Yes	None
74	Female	Did not finish High School	Married	Home Maker	Excellent	Yes	Yes	None
75	Male	College Graduate	Married	Employed full time	Very Good	Yes	Yes	Vision screening
50	Female	College Graduate	Married	Employed part time	Very Good	No	Yes	None
100	Female	Other	Married	Home Maker	Very Good	Yes	Yes	None
62	Female	College Graduate	Married	Employed part time	Good	No	Yes	None
56	Female	College Graduate	Married	Employed full time	Good	No	Yes	None
112	Female	Other	Married	Home Maker	Very Good	Yes	Yes	None
64	Male	Diploma	Single	Employed full time	Excellent	No	Yes	None
74	Female	College Graduate	Married	Employed full time	Very Good	Yes	Yes	None
54	Female	College Graduate	Married	Employed part time	Good	No	Yes	None
57	Female	College Graduate	Married	Employed full time	Good	No	Yes	None
100	Female	Other	Married	Home Maker	Very Good	Yes	Yes	None
99	Female	Other	Single	Home Maker	Very Good	No	Yes	Vision screening
89	Female	High School	Married	Home Maker	Very Good	Yes	Yes	None
63	Male	High School	Married	Employed full time	Excellent	Yes	Yes	None
111	Female	primary School	Single	Home Maker	Poor	Yes	Yes	None
73	Male	Master Graduate	Married	Employed full time	Very Good	Yes	Yes	None
104	Female	College Graduate	Single	Retired	Very Good	No	Yes	None
123	Female	College Graduate	Married	Retired	Fair	No	Yes	None
55	Female	Did not finish High School	Married	Employed part time	Very Good	No	Yes	None
56	Male	College Graduate	Married	Home Maker	Excellent	No	Yes	None
50	Female	College Graduate	Married	Home Maker	Excellent	Yes	Yes	None
87	Female	Diploma	Married	Employed full time	Very Good	No	Yes	None
40	Female	College Graduate	Single	Employed full time	Good	Yes	Yes	None
63	Male	Master Graduate	Married	Employed part time	Fair	No	Yes	None
72	Male	College Graduate	Married	Un employed less than a year	Very Good	No	Yes	None
108	Female	Other	Married	Home Maker	Very Good	Yes	Yes	None
89	Female	High School	Married	Home Maker	Fair	Yes	Yes	None
95	Female	College Graduate	Married	Retired	Very Good	Yes	Yes	None
86	Female	primary School	Married	Employed full time	Fair	Yes	Yes	None
88	Female	Other	Married	Home Maker	Very Good	No	Yes	None
100	Male	College Graduate	Married	Retired	Very Good	No	Yes	None
84	Male	College Graduate	Married	Employed full time	Good	No	Yes	None
82	Female	Did not finish High School	Married	Home Maker	Fair	Yes	Yes	Vision screening
97	Female	Other	Married	Home Maker	Fair	Yes	Yes	None
89	Female	Other	Married	Home Maker	Good	Yes	Yes	None
88	Female	Other	Married	Home Maker	Very Good	No	Yes	None
98	Male	Other	Married	Retired	Good	Yes	Yes	Vision screening
100	Male	Other	Married	Retired	Good	Yes	Yes	None
90	Male	primary School	Married	Retired	Very Good	Yes	Yes	None
82	Male	College Graduate	Married	Employed full time	Good	Yes	Yes	Vision screening
68	Female	Diploma	Married	Employed full time	Very Good	No	Yes	None
90	Male	High School	Married	Retired	Excellent	Yes	Yes	None
104	Female	Other	Married	Home Maker	Excellent	No	Yes	None
108	Male	Other	Married	Retired	Excellent	Yes	Yes	None
98	Male	Other	Married	Retired	Good	Yes	Yes	None
97	Male	College Graduate	Married	Employed full time	Very Good	No	Yes	None
62	Female	College Graduate	Married	Employed full time	Very Good	No	Yes	None
54	Female	High School	Married	Home Maker	Excellent	No	Yes	None
73	Female	Diploma	Married	Un employed more than a year	Very Good	Yes	Yes	None
70	Male	College Graduate	Married	Un employed more than a year	Very Good	Yes	Yes	None
74	Female	College Graduate	Married	Employed part time	Excellent	No	Yes	Vision screening
57	Female	College Graduate	Married	Employed full time	Fair	No	Yes	None
78	Male	College Graduate	Married	Employed full time	Excellent	Yes	Yes	None
29	Female	High School	Single	Un employed due to an illness or disability	Fair	No	Yes	None
99	Female	primary School	Single	Home Maker	Fair	Yes	Yes	None
47	Female	High School	Married	Home Maker	Very Good	No	Yes	None
54	Female	High School	Married	Home Maker	Very Good	No	Yes	None
57	Female	College Graduate	Single	Home Maker	Very Good	No	Yes	None
100	Female	Other	Married	Home Maker	Very Good	Yes	Yes	None
97	Female	Other	Married	Home Maker	Very Good	Yes	Yes	None
112	Female	Did not finish High School	Married	Retired	Excellent	Yes	Yes	None
63	Female	Other	Married	Home Maker	Very Good	Yes	Yes	None
103	Male	Diploma	Single	Employed full time	Excellent	Yes	Yes	None
61	Female	College Graduate	Married	Un employed less than a year	Excellent	No	Yes	None
84	Female	Master Graduate	Married	Retired	Good	No	Yes	Vision screening
74	Male	Other	Married	Employed full time	Very Good	Yes	Yes	None
61	Female	Other	Married	Home Maker	Very Good	Yes	Yes	None
103	Female	Other	Married	Home Maker	Very Good	Yes	Yes	None
82	Male	Other	Married	Retired	Excellent	Yes	Yes	None
61	Female	College Graduate	Married	Home Maker	Fair	No	Yes	None
82	Female	Other	Married	Home Maker	Very Good	Yes	Yes	None
95	Female	High School	Married	Home Maker	Excellent	Yes	Yes	None
73	Female	primary School	Married	Home Maker	Very Good	Yes	Yes	None
68	Male	High School	Married	Employed full time	Excellent	Yes	Yes	None
68	Female	Other	Married	Home Maker	Very Good	Yes	Yes	None
45	Female	College Graduate	Single	Employed full time	Good	No	Yes	None
112	Male	Did not finish High School	Married	Retired	Good	Yes	Yes	None
57	Female	College Graduate	Married	Employed full time	Good	No	Yes	None
100	Female	Other	Married	Home Maker	Good	Yes	Yes	None
88	Female	Other	Married	Home Maker	Very Good	No	Yes	None
68	Male	High School	Married	Employed full time	Good	Yes	Yes	None
72	Male	Other	Married	Employed full time	Very Good	Yes	Yes	None
87	Female	Other	Married	Home Maker	Excellent	Yes	Yes	None
68	Male	High School	Married	Employed full time	Very Good	No	Yes	None
127	Male	Other	Married	Un employed more than a year	Very Good	Yes	Yes	None
46	Female	High School	Single	Home Maker	Excellent	No	Yes	None
73	Female	Other	Married	Home Maker	Very Good	Yes	Yes	None
43	Male	College Graduate	Single	Un employed less than a year	Poor	Yes	Yes	None
57	Male	College Graduate	Married	Employed full time	Excellent	No	Yes	None
60	Male	Master Graduate	Married	Un employed due to an illness or disability	Poor	No	Yes	None
83	Female	Other	Married	Home Maker	Very Good	Yes	Yes	None
73	Male	Master Graduate	Married	Employed full time	Excellent	Yes	Yes	None
101	Female	Dectorate	Married	Retired	Fair	Yes	Yes	None
56	Female	College Graduate	Married	Employed full time	Very Good	No	Yes	None
119	Female	Other	Single	Retired	Excellent	Yes	Yes	None
91	Female	Dectorate	Single	Employed full time	Excellent	No	Yes	None
109	Male	primary School	Married	Employed full time	Good	Yes	Yes	None
57	Female	College Graduate	Married	Employed full time	Fair	No	Yes	None
122	Male	Other	Single	Retired	Poor	Yes	Yes	None
69	Female	Dectorate	Single	Employed full time	Excellent	No	Yes	None
72	Male	Dectorate	Married	Employed full time	Very Good	No	Yes	None
57	Female	College Graduate	Married	Employed full time	Fair	Yes	Yes	None
61	Female	College Graduate	Married	Employed part time	Poor	No	Yes	None
57	Female	College Graduate	Married	Employed full time	Good	No	Yes	None
59	Male	High School	Single	Employed full time	Fair	Yes	Yes	None
99	Male	College Graduate	Married	Retired	Good	Yes	Yes	None
74	Male	Master Graduate	Married	Employed part time	Good	No	Yes	None
86	Male	High School	Married	Employed full time	Very Good	No	Yes	None
44	Male	Diploma	Single	Employed full time	Good	No	Yes	Vision screening
50	Female	College Graduate	Married	Home Maker	Excellent	No	Yes	None
82	Male	primary School	Married	Employed full time	Very Good	Yes	Yes	None
85	Male	Other	Married	Employed full time	Good	Yes	Yes	None
49	Male	College Graduate	Single	Student	Good	Yes	Yes	None
90	Female	Did not finish High School	Married	Home Maker	Good	Yes	Yes	None
77	Female	High School	Married	Home Maker	Good	Yes	Yes	None
119	Male	Other	Married	Retired	Fair	Yes	Yes	None
97	Female	Other	Married	Home Maker	Good	Yes	Yes	None
89	Female	Other	Married	Home Maker	Fair	Yes	Yes	None
84	Female	College Graduate	Married	Home Maker	Very Good	Yes	Yes	None
35	Male	Other	Single	Student	Good	No	Yes	None
60	Female	College Graduate	Married	Home Maker	Good	Yes	Yes	None
55	Female	College Graduate	Married	Un employed less than a year	Excellent	Yes	Yes	None
60	Female	College Graduate	Married	Employed full time	Very Good	Yes	Yes	None
100	Male	Did not finish High School	Married	Retired	Very Good	Yes	Yes	None
62	Female	High School	Married	Home Maker	Very Good	Yes	Yes	None
69	Female	High School	Married	Home Maker	Excellent	Yes	Yes	None
121	Male	Other	Married	Retired	Poor	Yes	Yes	Vision screening
59	Male	College Graduate	Married	Employed part time	Good	Yes	Yes	None
68	Female	College Graduate	Married	Un employed more than a year	Good	Yes	Yes	None
83	Female	Other	Married	Home Maker	Very Good	Yes	Yes	None
113	Male	primary School	Married	Retired	Fair	Yes	Yes	None
87	Male	Did not finish High School	Married	Retired	Very Good	No	Yes	None
99	Male	primary School	Married	Retired	Very Good	No	Yes	None
90	Male	College Graduate	Married	Retired	Very Good	Yes	Yes	None
104	Male	College Graduate	Married	Retired	Good	No	Yes	None
82	Female	primary School	Married	Home Maker	Very Good	Yes	Yes	None
95	Male	Master Graduate	Married	Retired	Very Good	No	Yes	None
91	Male	High School	Married	Employed full time	Excellent	No	Yes	None
88	Male	High School	Married	Employed full time	Excellent	No	Yes	None
64	Male	High School	Married	Employed full time	Excellent	Yes	Yes	None
111	Male	High School	Married	Employed full time	Excellent	No	Yes	None
86	Male	High School	Married	Employed full time	Excellent	No	Yes	None
108	Male	Other	Married	Retired	Poor	No	Yes	Vision screening
113	Male	Other	Married	Retired	Excellent	Yes	Yes	None
98	Male	High School	Married	Retired	Good	Yes	Yes	Vision screening
28	Male	High School	Single	Student	Fair	No	Yes	None
62	Female	High School	Married	Employed full time	Very Good	Yes	Yes	None
46	Female	Other	Married	Home Maker	Very Good	Yes	Yes	None
82	Female	High School	Married	Home Maker	Very Good	No	Yes	None
35	Female	High School	Single	Student	Good	Yes	Yes	None
97	Female	College Graduate	Single	Retired	Very Good	Yes	Yes	None
60	Male	Other	Married	Retired	Excellent	Yes	Yes	None
91	Male	High School	Married	Retired	Good	No	Yes	None
99	Female	High School	Married	Home Maker	Good	Yes	Yes	None
68	Female	College Graduate	Married	Home Maker	Excellent	No	Yes	None
87	Female	High School	Married	Home Maker	Very Good	No	Yes	None
101	Male	Did not finish High School	Married	Retired	Fair	No	Yes	None
62	Female	College Graduate	Married	Home Maker	Excellent	No	Yes	None
55	Male	Other	Married	Home Maker	Very Good	Yes	Yes	None
83	Male	Other	Married	Employed full time	Excellent	Yes	Yes	None
47	Male	Diploma	Single	Employed part time	Very Good	No	Yes	None
35	Male	Did not finish High School	Single	Student	Very Good	Yes	Yes	None
98	Male	Diploma	Married	Retired	Excellent	Yes	Yes	None
73	Female	Dectorate	Single	Employed full time	Poor	Yes	Yes	Vision screening
44	Male	Diploma	Single	Employed full time	Excellent	Yes	Yes	Vision screening
85	Male	Did not finish High School	Married	Employed full time	Excellent	Yes	Yes	None
90	Female	Other	Married	Retired	Fair	No	Yes	None
59	Female	College Graduate	Married	Un employed due to an illness or disability	Excellent	Yes	Yes	Vision screening
69	Male	High School	Married	Retired	Excellent	Yes	Yes	Vision screening
46	Male	College Graduate	Single	Un employed more than a year	Excellent	Yes	Yes	Vision screening
90	Male	High School	Married	Retired	Very Good	No	Yes	None
59	Female	College Graduate	Married	Home Maker	Very Good	No	Yes	None
82	Female	High School	Married	Home Maker	Excellent	Yes	Yes	None
47	Female	College Graduate	Married	Un employed due to an illness or disability	Poor	No	Yes	None
46	Female	College Graduate	Single	Employed part time	Fair	No	Yes	None
57	Female	College Graduate	Married	Un employed more than a year	Good	No	Yes	None
49	Female	College Graduate	Married	Employed full time	Good	No	Yes	None
57	Female	Diploma	Married	Employed part time	Good	No	Yes	None
57	Female	Diploma	Married	Employed part time	Good	No	Yes	None
62	Female	High School	Married	Home Maker	Very Good	Yes	Yes	None
60	Female	College Graduate	Married	Employed part time	Fair	Yes	Yes	None
57	Female	College Graduate	Married	Student	Fair	No	Yes	None
62	Female	Diploma	Married	Employed full time	Very Good	No	Yes	None
43	Female	High School	Single	Student	Poor	Yes	Yes	None
63	Male	College Graduate	Married	Employed full time	Excellent	No	Yes	Vision screening
77	Male	primary School	Married	Employed full time	Very Good	Yes	Yes	None
46	Female	High School	Married	Home Maker	Good	Yes	Yes	None
59	Male	College Graduate	Married	Employed full time	Excellent	Yes	Yes	None
74	Male	Diploma	Married	Employed full time	Excellent	Yes	Yes	None
57	Female	College Graduate	Married	Employed full time	Good	No	Yes	None
111	Female	High School	Single	Retired	Poor	Yes	Yes	None
45	Male	College Graduate	Single	Employed full time	Excellent	Yes	Yes	None
50	Female	Diploma	Single	Home Maker	Fair	No	Yes	None
50	Female	College Graduate	Married	Employed full time	Fair	No	Yes	None
57	Female	College Graduate	Single	Home Maker	Excellent	Yes	Yes	None
57	Female	College Graduate	Married	Un employed more than a year	Good	No	Yes	None
124	Male	High School	Married	Retired	Good	Yes	Yes	None
42	Male	High School	Single	Student	Fair	No	Yes	None
45	Male	Diploma	Single	Employed full time	Excellent	No	Yes	Vision screening
102	Male	primary School	Married	Retired	Very Good	Yes	Yes	None
61	Male	College Graduate	Married	Employed full time	Excellent	No	Yes	Vision screening
64	Female	Diploma	Married	Un employed more than a year	Very Good	Yes	Yes	None
44	Female	Diploma	Married	Student	Fair	Yes	Yes	Vision screening
68	Female	Diploma	Married	Employed part time	Very Good	Yes	Yes	None
70	Female	High School	Married	Home Maker	Very Good	No	Yes	Vision screening
59	Female	College Graduate	Married	Employed part time	Good	Yes	Yes	None
68	Female	College Graduate	Married	Home Maker	Very Good	No	Yes	None
49	Female	College Graduate	Married	Employed full time	Excellent	Yes	Yes	None
54	Female	Master Graduate	Single	Employed full time	Good	Yes	Yes	None
68	Male	High School	Single	Employed full time	Excellent	No	Yes	Vision screening
87	Female	College Graduate	Married	Retired	Excellent	No	Yes	None
57	Male	College Graduate	Married	Employed full time	Good	No	Yes	None
111	Male	College Graduate	Married	Retired	Excellent	Yes	Yes	None
86	Male	College Graduate	Married	Employed full time	Excellent	Yes	Yes	None
82	Female	High School	Married	Employed full time	Very Good	Yes	Yes	None
91	Female	College Graduate	Married	Retired	Very Good	No	Yes	None
73	Male	College Graduate	Married	Employed full time	Very Good	No	Yes	None
60	Female	High School	Married	Home Maker	Very Good	No	Yes	None
60	Female	High School	Married	Home Maker	Very Good	No	Yes	None
100	Male	College Graduate	Married	Retired	Very Good	No	Yes	None
54	Female	High School	Married	Home Maker	Very Good	Yes	Yes	None
101	Female	High School	Married	Retired	Excellent	No	Yes	None
98	Female	High School	Married	Home Maker	Good	No	Yes	None
95	Male	College Graduate	Married	Retired	Good	Yes	Yes	None
95	Male	High School	Married	Employed full time	Very Good	Yes	Yes	None
100	Male	primary School	Married	Retired	Fair	Yes	Yes	None
68	Female	Did not finish High School	Married	Home Maker	Excellent	Yes	Yes	None
85	Male	Other	Married	Retired	Very Good	Yes	Yes	None
82	Male	Other	Married	Employed full time	Excellent	Yes	Yes	None
77	Male	Other	Married	Employed full time	Very Good	Yes	Yes	None
73	Male	High School	Married	Employed full time	Very Good	Yes	Yes	Vision screening
68	Male	Other	Married	Employed full time	Very Good	Yes	Yes	None
83	Male	Other	Married	Employed full time	Very Good	Yes	Yes	None
86	Female	Other	Married	Home Maker	Very Good	Yes	Yes	None
68	Female	Other	Married	Home Maker	Very Good	Yes	Yes	None
86	Female	primary School	Married	Home Maker	Fair	Yes	Yes	None
86	Female	Other	Married	Home Maker	Very Good	Yes	Yes	None
97	Female	Other	Married	Retired	Very Good	Yes	Yes	None
73	Female	Other	Married	Un employed due to an illness or disability	Fair	Yes	Yes	None
60	Male	High School	Married	Employed full time	Excellent	Yes	Yes	None
60	Female	College Graduate	Married	Employed full time	Very Good	No	Yes	None
74	Female	Other	Married	Home Maker	Very Good	Yes	Yes	None
109	Male	Other	Married	Un employed more than a year	Very Good	Yes	Yes	None
91	Female	Other	Married	Home Maker	Very Good	Yes	Yes	None
97	Male	Other	Married	Un employed more than a year	Very Good	Yes	Yes	None
96	Male	Master Graduate	Married	Retired	Very Good	No	Yes	None
90	Male	High School	Married	Employed full time	Excellent	Yes	Yes	Vision screening
74	Male	Other	Married	Employed full time	Very Good	No	Yes	None
97	Male	Dectorate	Married	Retired	Very Good	Yes	Yes	None
122	Female	High School	Married	Retired	Poor	Yes	Yes	None
101	Female	Dectorate	Single	Retired	Fair	Yes	Yes	None
49	Female	College Graduate	Married	Student	Good	No	Yes	None
61	Male	College Graduate	Single	Employed full time	Fair	No	Yes	None
84	Male	High School	Married	Retired	Very Good	Yes	Yes	None
99	Female	College Graduate	Single	Un employed less than a year	Excellent	Yes	Yes	None
95	Male	Diploma	Married	Retired	Very Good	Yes	Yes	None
102	Female	primary School	Married	Home Maker	Good	Yes	Yes	None
102	Female	primary School	Married	Home Maker	Good	Yes	Yes	None
102	Female	primary School	Married	Home Maker	Good	Yes	Yes	None
95	Male	College Graduate	Married	Retired	Very Good	Yes	Yes	None
57	Female	College Graduate	Married	Employed full time	Poor	No	Yes	None
57	Female	College Graduate	Married	Employed full time	Fair	No	Yes	None
57	Female	College Graduate	Married	Employed part time	Good	No	Yes	None
63	Female	Diploma	Married	Un employed more than a year	Poor	No	Yes	None
95	Female	Other	Married	Home Maker	Very Good	Yes	Yes	None
70	Male	High School	Married	Employed full time	Very Good	No	Yes	None
57	Female	College Graduate	Married	Employed full time	Fair	No	Yes	None
50	Female	Diploma	Married	Employed part time	Good	No	Yes	None
108	Male	College Graduate	Married	Retired	Very Good	No	Yes	None
62	Male	Diploma	Married	Un employed due to an illness or disability	Very Good	No	Yes	None
108	Female	Other	Married	Home Maker	Very Good	Yes	Yes	None
102	Female	Other	Married	Home Maker	Fair	Yes	Yes	None
72	Female	Other	Married	Home Maker	Good	No	Yes	None
99	Male	Other	Married	Retired	Good	Yes	Yes	None
84	Female	Other	Married	Employed full time	Good	Yes	Yes	None
82	Male	Other	Married	Employed full time	Fair	Yes	Yes	None
90	Male	Other	Married	Employed full time	Good	No	Yes	None
103	Male	Other	Married	Retired	Fair	No	Yes	None
90	Male	primary School	Married	Employed full time	Good	Yes	Yes	None
91	Male	primary School	Married	Retired	Fair	Yes	Yes	None
75	Female	High School	Married	Employed full time	Very Good	No	Yes	None
99	Female	Other	Married	Home Maker	Good	Yes	Yes	None
97	Male	High School	Married	Retired	Very Good	No	Yes	None
100	Male	Other	Married	Retired	Good	Yes	Yes	None
77	Female	Other	Married	Employed full time	Good	No	Yes	None
103	Male	Other	Married	Retired	Fair	Yes	Yes	None
97	Female	Other	Married	Home Maker	Fair	Yes	Yes	None
88	Male	primary School	Married	Retired	Fair	Yes	Yes	None
101	Male	High School	Married	Retired	Very Good	Yes	Yes	None
86	Male	High School	Married	Retired	Very Good	No	Yes	None
82	Male	Did not finish High School	Married	Employed part time	Good	Yes	Yes	None
95	Female	Master Graduate	Married	Retired	Good	Yes	Yes	None
68	Male	High School	Married	Employed full time	Very Good	No	Yes	None
96	Male	Master Graduate	Married	Retired	Very Good	Yes	Yes	None
61	Male	College Graduate	Married	Employed full time	Excellent	No	Yes	None
61	Female	High School	Married	Student	Excellent	Yes	Yes	Vision screening
74	Female	primary School	Married	Home Maker	Very Good	Yes	Yes	Vision screening
82	Male	Other	Married	Retired	Very Good	No	Yes	None
46	Male	High School	Single	Employed part time	Excellent	No	Yes	None
100	Female	High School	Married	Home Maker	Very Good	Yes	Yes	None
91	Female	primary School	Married	Employed full time	Good	Yes	Yes	None
83	Female	Master Graduate	Single	Home Maker	Fair	Yes	Yes	None
78	Male	Master Graduate	Married	Employed full time	Very Good	No	Yes	Vision screening
98	Male	College Graduate	Married	Home Maker	Excellent	Yes	Yes	Vision screening
123	Male	College Graduate	Single	Employed full time	Poor	Yes	Yes	None
75	Female	High School	Married	Home Maker	Good	Yes	Yes	None
95	Female	Other	Married	Home Maker	Very Good	Yes	Yes	None
54	Male	Did not finish High School	Single	Employed full time	Excellent	Yes	Yes	None
42	Male	High School	Single	Employed full time	Excellent	No	Yes	None
49	Female	High School	Married	Home Maker	Excellent	No	Yes	None
62	Male	Master Graduate	Single	Employed full time	Excellent	No	Yes	None
57	Male	High School	Married	Employed full time	Very Good	No	Yes	None
104	Male	College Graduate	Married	Retired	Excellent	No	Yes	None
127	Female	College Graduate	Single	Retired	Poor	Yes	Yes	None
97	Female	Did not finish High School	Married	Un employed due to an illness or disability	Fair	No	Yes	None
50	Female	College Graduate	Married	Employed part time	Good	No	Yes	None
49	Female	College Graduate	Married	Employed full time	Good	No	Yes	None
57	Female	Diploma	Married	Employed part time	Good	No	Yes	None
42	Female	High School	Single	Employed full time	Fair	Yes	Yes	None
68	Female	High School	Married	Home Maker	Excellent	No	Yes	None
88	Female	College Graduate	Married	Employed part time	Very Good	No	Yes	None
82	Female	Diploma	Married	Retired	Excellent	No	Yes	None
60	Female	High School	Married	Home Maker	Excellent	Yes	Yes	None
68	Female	Did not finish High School	Married	Home Maker	Very Good	No	Yes	None
40	Female	College Graduate	Married	Student	Fair	No	Yes	None
87	Female	Other	Married	Home Maker	Very Good	Yes	Yes	None
54	Male	High School	Married	Employed full time	Very Good	Yes	Yes	None
102	Male	Other	Married	Employed full time	Good	Yes	Yes	None
57	Female	Diploma	Married	Employed full time	Good	No	Yes	None
97	Male	Master Graduate	Married	Employed full time	Very Good	No	Yes	None
47	Female	Diploma	Married	Retired	Excellent	Yes	Yes	None
72	Male	College Graduate	Married	Employed full time	Excellent	No	Yes	None
85	Male	Other	Married	Employed full time	Excellent	Yes	Yes	None
98	Female	Other	Married	Home Maker	Very Good	Yes	Yes	None
63	Male	College Graduate	Married	Employed full time	Excellent	No	Yes	None
103	Female	Diploma	Single	Retired	Good	Yes	Yes	None
86	Female	College Graduate	Married	Un employed less than a year	Fair	Yes	Yes	None
84	Female	Diploma	Married	Home Maker	Fair	No	Yes	None
88	Female	Other	Married	Home Maker	Very Good	Yes	Yes	Vision screening
89	Male	Dectorate	Single	Employed full time	Good	Yes	Yes	None
75	Male	Other	Married	Employed full time	Fair	Yes	Yes	None
60	Male	College Graduate	Married	Employed full time	Excellent	No	Yes	None
101	Male	College Graduate	Married	Retired	Very Good	Yes	Yes	None
90	Male	College Graduate	Married	Employed full time	Excellent	No	Yes	None
95	Male	College Graduate	Married	Retired	Very Good	Yes	Yes	None
101	Male	College Graduate	Married	Retired	Very Good	Yes	Yes	None
42	Female	College Graduate	Married	Home Maker	Good	Yes	Yes	None
95	Female	Other	Married	Home Maker	Very Good	Yes	Yes	None
126	Male	College Graduate	Married	Retired	Good	Yes	Yes	None
113	Female	Other	Married	Home Maker	Very Good	Yes	Yes	None
108	Female	Other	Married	Home Maker	Very Good	Yes	Yes	None
108	Female	Other	Married	Home Maker	Very Good	Yes	Yes	None
66	Female	Other	Single	Un employed more than a year	Very Good	Yes	Yes	None
95	Female	Other	Single	Home Maker	Fair	Yes	Yes	None
73	Male	Diploma	Married	Employed full time	Good	No	Yes	None
95	Female	primary School	Married	Home Maker	Good	No	Yes	None
100	Male	primary School	Married	Retired	Good	Yes	Yes	None
54	Male	College Graduate	Single	Student	Excellent	No	Yes	None
68	Male	High School	Married	Employed full time	Very Good	No	Yes	None
85	Male	Did not finish High School	Married	Employed full time	Very Good	No	Yes	None
117	Female	Other	Married	Home Maker	Good	Yes	Yes	None
99	Male	College Graduate	Married	Retired	Very Good	Yes	Yes	None
49	Female	College Graduate	Married	Employed part time	Good	No	Yes	None
57	Female	College Graduate	Married	Employed part time	Good	No	Yes	None
50	Female	College Graduate	Single	Employed part time	Fair	No	Yes	None
60	Male	College Graduate	Single	Employed full time	Very Good	Yes	Yes	None
132	Female	primary School	Married	Home Maker	Excellent	Yes	Yes	None
112	Female	Master Graduate	Married	Student	Poor	Yes	Yes	None
88	Female	Master Graduate	Single	Employed full time	Good	No	Yes	None
95	Male	College Graduate	Married	Retired	Very Good	Yes	Yes	Vision screening
54	Male	College Graduate	Single	Employed full time	Excellent	No	Yes	None
97	Male	High School	Married	Retired	Good	Yes	Yes	None
66	Female	Other	Single	Un employed more than a year	Very Good	No	Yes	None
89	Male	College Graduate	Married	Retired	Very Good	Yes	Yes	Vision screening
101	Male	Other	Married	Retired	Fair	Yes	Yes	None
90	Female	Other	Married	Home Maker	Fair	Yes	Yes	Vision screening
96	Male	Other	Married	Retired	Excellent	Yes	Yes	None
64	Female	College Graduate	Married	Employed part time	Good	No	Yes	None
108	Male	primary School	Married	Retired	Poor	No	Yes	Vision screening
102	Male	Diploma	Married	Retired	Fair	Yes	Yes	Vision screening
70	Female	Diploma	Married	Employed full time	Fair	Yes	Yes	None
70	Female	Diploma	Married	Employed full time	Fair	Yes	Yes	None
90	Male	High School	Married	Employed part time	Very Good	Yes	Yes	None
102	Female	Other	Married	Home Maker	Fair	Yes	Yes	None
104	Male	Other	Married	Retired	Fair	Yes	Yes	None
95	Male	Other	Married	Retired	Fair	Yes	Yes	None
75	Male	College Graduate	Married	Employed full time	Fair	Yes	Yes	None
113	Female	Other	Married	Home Maker	Good	Yes	Yes	None
91	Female	Other	Married	Home Maker	Good	Yes	Yes	None
103	Female	High School	Married	Employed full time	Good	Yes	Yes	Vision screening
85	Male	High School	Married	Employed full time	Good	Yes	Yes	None
88	Female	primary School	Married	Home Maker	Excellent	No	Yes	None
90	Male	High School	Married	Employed full time	Good	Yes	Yes	None
90	Male	primary School	Married	Employed full time	Good	Yes	Yes	None
87	Male	Master Graduate	Married	Employed full time	Very Good	No	Yes	None
75	Male	College Graduate	Married	Employed full time	Fair	Yes	Yes	None
86	Female	Other	Married	Home Maker	Fair	Yes	Yes	None
108	Male	Master Graduate	Married	Retired	Very Good	Yes	Yes	None
82	Female	High School	Married	Home Maker	Fair	Yes	Yes	None
75	Male	High School	Married	Employed full time	Fair	Yes	Yes	None
70	Female	primary School	Married	Employed full time	Fair	Yes	Yes	None
89	Male	High School	Married	Employed full time	Fair	Yes	Yes	None
95	Male	High School	Married	Retired	Fair	Yes	Yes	None
72	Female	Did not finish High School	Married	Home Maker	Very Good	Yes	Yes	None
108	Male	High School	Married	Employed full time	Fair	Yes	Yes	None
95	Male	High School	Married	Retired	Fair	Yes	Yes	None
101	Male	High School	Married	Retired	Fair	Yes	Yes	None
88	Female	Diploma	Married	Home Maker	Fair	Yes	Yes	None
87	Female	High School	Married	Home Maker	Good	Yes	Yes	None
102	Female	High School	Married	Home Maker	Fair	Yes	Yes	None
114	Female	primary School	Married	Home Maker	Good	Yes	Yes	None
91	Female	primary School	Married	Home Maker	Fair	Yes	Yes	None
111	Male	High School	Married	Retired	Fair	Yes	Yes	None
120	Female	primary School	Married	Retired	Good	No	Yes	None
98	Female	primary School	Married	Home Maker	Good	No	Yes	None
103	Female	primary School	Married	Home Maker	Good	No	Yes	None
104	Male	High School	Married	Retired	Fair	Yes	Yes	None
104	Male	Other	Married	Retired	Fair	Yes	Yes	None
56	Female	High School	Married	Employed full time	Very Good	No	Yes	None
88	Female	Other	Married	Home Maker	Very Good	No	Yes	None
90	Male	High School	Married	Retired	Excellent	Yes	Yes	None
104	Male	Other	Married	Un employed more than a year	Very Good	Yes	Yes	None
91	Male	Other	Married	Un employed more than a year	Very Good	Yes	Yes	None
90	Female	Other	Married	Home Maker	Very Good	Yes	Yes	None
87	Female	Other	Married	Employed part time	Excellent	Yes	Yes	None
86	Male	Other	Married	Employed full time	Very Good	Yes	Yes	None
82	Female	Did not finish High School	Married	Home Maker	Very Good	Yes	Yes	Vision screening
82	Female	High School	Married	Home Maker	Poor	No	Yes	None
82	Female	Did not finish High School	Married	Home Maker	Poor	Yes	Yes	None
29	Male	primary School	Single	Student	Good	Yes	Yes	None
95	Female	Did not finish High School	Married	Home Maker	Poor	No	Yes	None
84	Female	Diploma	Married	Home Maker	Fair	Yes	Yes	None
91	Female	primary School	Married	Home Maker	Good	Yes	Yes	None
99	Male	College Graduate	Married	Retired	Fair	Yes	Yes	Vision screening
85	Male	College Graduate	Married	Employed full time	Fair	Yes	Yes	None
111	Male	High School	Married	Retired	Fair	Yes	Yes	Vision screening
47	Female	College Graduate	Single	Employed full time	Good	Yes	Yes	None
88	Male	College Graduate	Married	Employed full time	Fair	Yes	Yes	None
101	Male	Other	Married	Retired	Fair	Yes	Yes	None
88	Male	primary School	Married	Employed full time	Very Good	Yes	Yes	None
83	Female	Other	Married	Home Maker	Fair	Yes	Yes	None
74	Male	College Graduate	Married	Employed full time	Fair	Yes	Yes	None
83	Male	High School	Married	Employed full time	Good	No	Yes	None
77	Male	High School	Married	Employed full time	Fair	Yes	Yes	None
88	Female	primary School	Married	Home Maker	Excellent	Yes	Yes	None
101	Male	Other	Married	Retired	Very Good	Yes	Yes	None
70	Male	Other	Married	Employed full time	Very Good	Yes	Yes	None
82	Male	High School	Married	Retired	Good	No	Yes	None
101	Male	High School	Married	Retired	Fair	No	Yes	None
100	Male	Other	Married	Retired	Good	Yes	Yes	None
72	Female	Did not finish High School	Married	Home Maker	Fair	No	Yes	None
73	Male	College Graduate	Married	Employed full time	Good	No	Yes	None
115	Male	primary School	Married	Retired	Excellent	Yes	Yes	None
70	Male	College Graduate	Married	Employed full time	Good	No	Yes	None
60	Female	Diploma	Married	Employed full time	Very Good	No	Yes	None
54	Male	College Graduate	Married	Employed full time	Excellent	Yes	Yes	None
62	Male	Diploma	Married	Employed full time	Excellent	Yes	Yes	None
68	Male	High School	Married	Employed full time	Very Good	Yes	Yes	None
72	Male	High School	Married	Employed full time	Good	Yes	Yes	None
42	Male	High School	Single	Retired	Excellent	No	Yes	None
47	Female	High School	Married	Home Maker	Very Good	Yes	Yes	None
57	Male	College Graduate	Married	Employed full time	Excellent	Yes	Yes	None
95	Male	Other	Married	Employed full time	Very Good	No	Yes	None
71	Female	College Graduate	Married	Home Maker	Excellent	Yes	Yes	None
56	Male	College Graduate	Married	Employed full time	Fair	No	Yes	None
95	Male	College Graduate	Married	Retired	Very Good	Yes	Yes	None
95	Male	primary School	Married	Retired	Very Good	No	Yes	None
59	Male	Other	Married	Employed full time	Excellent	No	Yes	None
123	Female	Other	Married	Home Maker	Very Good	Yes	Yes	None
82	Male	High School	Married	Employed full time	Excellent	No	Yes	None
95	Female	Other	Married	Retired	Very Good	Yes	Yes	None
82	Female	Other	Married	Un employed more than a year	Very Good	Yes	Yes	None
57	Female	Diploma	Married	Employed part time	Fair	No	Yes	None
57	Female	College Graduate	Married	Employed part time	Good	No	Yes	None
63	Female	Diploma	Married	Un employed more than a year	Fair	No	Yes	None
82	Female	High School	Married	Home Maker	Excellent	Yes	Yes	None
88	Female	High School	Married	Home Maker	Very Good	No	Yes	None
100	Female	primary School	Married	Home Maker	Fair	Yes	Yes	Vision screening
56	Female	College Graduate	Married	Employed part time	Good	Yes	Yes	None
50	Female	College Graduate	Married	Employed part time	Fair	No	Yes	None
63	Female	College Graduate	Married	Employed part time	Fair	No	Yes	None
64	Female	College Graduate	Married	Employed part time	Very Good	No	Yes	None
50	Female	College Graduate	Married	Employed full time	Very Good	No	Yes	None
50	Female	College Graduate	Married	Un employed less than a year	Good	No	Yes	None
38	Female	High School	Single	Student	Good	No	Yes	Vision screening
115	Female	Other	Married	Home Maker	Good	Yes	Yes	None
95	Female	Other	Married	Home Maker	Good	Yes	Yes	None
61	Male	Other	Married	Home Maker	Good	Yes	Yes	None
108	Male	primary School	Married	Retired	Good	Yes	Yes	None
98	Female	Other	Married	Home Maker	Good	Yes	Yes	None
91	Male	Other	Married	Retired	Fair	Yes	Yes	None
60	Female	Other	Married	Home Maker	Very Good	Yes	Yes	None
108	Female	Other	Married	Home Maker	Very Good	Yes	Yes	None
108	Female	Other	Married	Home Maker	Good	Yes	Yes	None
77	Male	Diploma	Married	Employed full time	Good	Yes	Yes	Vision screening
103	Female	Other	Married	Home Maker	Very Good	Yes	Yes	None
117	Female	Other	Married	Home Maker	Very Good	No	Yes	None
68	Female	High School	Married	Home Maker	Excellent	No	Yes	None
100	Female	Other	Married	Home Maker	Very Good	Yes	Yes	None
96	Male	Other	Married	Retired	Good	No	Yes	None
88	Female	Other	Married	Home Maker	Very Good	No	Yes	None
82	Male	Other	Married	Un employed more than a year	Very Good	Yes	Yes	None
108	Male	Other	Married	Retired	Very Good	Yes	Yes	None
100	Male	Master Graduate	Married	Retired	Very Good	No	Yes	None
82	Male	High School	Married	Retired	Excellent	Yes	Yes	None
95	Female	Other	Married	Home Maker	Very Good	Yes	Yes	None
77	Female	primary School	Married	Home Maker	Fair	Yes	Yes	Vision screening
103	Female	Other	Married	Home Maker	Very Good	Yes	Yes	None
114	Female	High School	Married	Home Maker	Excellent	Yes	Yes	None
42	Female	High School	Single	Student	Excellent	No	Yes	None
50	Female	College Graduate	Single	Un employed less than a year	Good	No	Yes	None
96	Female	High School	Married	Home Maker	Excellent	Yes	Yes	None
100	Male	College Graduate	Married	Employed full time	Very Good	Yes	Yes	None
96	Male	College Graduate	Married	Retired	Very Good	Yes	Yes	None
43	Female	College Graduate	Married	Employed part time	Fair	No	Yes	None
77	Female	Other	Married	Home Maker	Excellent	No	Yes	None
55	Male	College Graduate	Single	Employed full time	Excellent	Yes	Yes	None
88	Male	High School	Married	Retired	Very Good	Yes	Yes	None
89	Male	High School	Married	Employed part time	Excellent	No	Yes	None
42	Female	High School	Single	Employed full time	Excellent	No	Yes	None
49	Male	College Graduate	Single	Employed full time	Good	No	Yes	None
42	Male	High School	Single	Employed full time	Very Good	Yes	Yes	None
68	Male	primary School	Married	Employed full time	Excellent	No	Yes	None
54	Male	High School	Married	Employed full time	Very Good	Yes	Yes	None
87	Male	High School	Married	Employed full time	Excellent	Yes	Yes	None
99	Female	Dectorate	Single	Retired	Poor	Yes	Yes	None
85	Female	College Graduate	Married	Employed full time	Very Good	No	Yes	Vision screening
87	Female	College Graduate	Married	Employed full time	Good	No	Yes	None
77	Male	Other	Married	Un employed more than a year	Excellent	No	Yes	None
82	Female	Dectorate	Married	Employed full time	Poor	No	Yes	None
60	Female	College Graduate	Married	Employed full time	Very Good	No	Yes	None
50	Female	College Graduate	Married	Employed full time	Good	No	Yes	None
50	Female	Diploma	Married	Employed part time	Fair	No	Yes	None
82	Male	primary School	Single	Retired	Excellent	Yes	Yes	None
55	Male	College Graduate	Married	Employed full time	Very Good	No	Yes	None
86	Male	High School	Married	Employed full time	Excellent	Yes	Yes	None
50	Female	College Graduate	Married	Employed part time	Fair	No	Yes	None
62	Female	College Graduate	Married	Un employed due to an illness or disability	Fair	No	Yes	None
50	Female	College Graduate	Single	Employed full time	Fair	No	Yes	None
50	Female	College Graduate	Single	Employed part time	Good	No	Yes	None
64	Female	College Graduate	Married	Un employed more than a year	Fair	No	Yes	None
60	Female	College Graduate	Married	Employed part time	Fair	No	Yes	None
60	Female	Master Graduate	Single	Home Maker	Excellent	No	Yes	None
111	Female	College Graduate	Single	Retired	Poor	Yes	Yes	None
74	Male	College Graduate	Married	Employed full time	Very Good	No	Yes	None
84	Male	College Graduate	Single	Employed full time	Excellent	Yes	Yes	None
57	Male	Master Graduate	Married	Employed part time	Poor	No	Yes	None
108	Male	Other	Married	Retired	Excellent	Yes	Yes	None
98	Male	College Graduate	Single	Retired	Excellent	Yes	Yes	None
43	Male	High School	Single	Employed full time	Excellent	No	Yes	None
111	Male	Diploma	Married	Retired	Poor	Yes	Yes	None
85	Female	Master Graduate	Married	Retired	Excellent	No	Yes	None
71	Male	High School	Married	Employed full time	Excellent	Yes	Yes	None
113	Male	Dectorate	Single	Employed full time	Good	No	Yes	None
65	Female	College Graduate	Married	Employed part time	Poor	No	Yes	None
57	Female	College Graduate	Married	Employed part time	Good	No	Yes	None
57	Female	Diploma	Married	Employed full time	Good	No	Yes	None
57	Female	College Graduate	Married	Employed full time	Fair	No	Yes	None
68	Male	Diploma	Married	Employed full time	Very Good	No	Yes	None
60	Female	College Graduate	Married	Home Maker	Excellent	No	Yes	None
62	Male	Other	Married	Employed full time	Excellent	Yes	Yes	None
99	Male	College Graduate	Married	Employed part time	Very Good	No	Yes	None
99	Male	Dectorate	Married	Retired	Good	Yes	Yes	None
50	Female	College Graduate	Married	Employed full time	Good	No	Yes	None
86	Female	Master Graduate	Married	Employed full time	Very Good	No	Yes	None
63	Female	Master Graduate	Married	Employed part time	Good	No	Yes	None
50	Female	Diploma	Single	Home Maker	Fair	No	Yes	None
57	Female	College Graduate	Married	Employed full time	Fair	No	Yes	None
62	Female	College Graduate	Married	Employed full time	Good	No	Yes	None
96	Male	Master Graduate	Married	Retired	Very Good	Yes	Yes	None
60	Female	College Graduate	Married	Employed full time	Good	No	Yes	None
82	Female	College Graduate	Married	Retired	Very Good	No	Yes	None
57	Female	College Graduate	Married	Employed full time	Fair	No	Yes	none
62	Female	College Graduate	Married	Employed full time	Fair	No	Yes	none
54	Female	College Graduate	Married	Employed part time	Good	No	Yes	none
61	Female	College Graduate	Married	Employed full time	Fair	No	Yes	none
64	Female	High School	Married	Employed full time	Good	No	Yes	none
